# Supplementary material
Source: PubMed Central journal article supplement (PMC7529405)
Supplement: mmc1.pdf [file mmc1.pdf]

# THE LANCET

## Supplementary appendix

This appendix formed part of the original submission and has been peer reviewed.  
We post it as supplied by the authors.

Supplement to: Narula S, Yusuf S, Chong M, et al. Plasma ACE2 and risk of death or cardiometabolic diseases: a case-cohort analysis. *Lancet* 2020; **396**: 968–76.

1  
2  
3  
4  
5  
6  
7  
8

## Supplementary Appendix

Table of Contents

|                                                                            |    |
|----------------------------------------------------------------------------|----|
| Supplementary Appendix 1: Supplementary Methods.....                       | 2  |
| Supplementary Appendix 2: Additional Results -- Supplementary Tables ..... | 23 |
| Supplementary Appendix 3: Additional Results – Supplementary Figures.....  | 32 |
| Works Cited.....                                                           | 40 |

9 Supplementary Appendix 1: Supplementary Methods

10 **Selection of Countries**

11 The following information on the PURE study is excerpted from our previously published protocol and subsequent  
12 publications which describe the design, sampling, and adjudication in detail.<sup>1</sup> The choice and number of countries  
13 selected in PURE reflects a balance between involving a large number of communities in countries at different  
14 economic levels, with substantial heterogeneity in social and economic circumstances and policies, and the  
15 feasibility of centers to successfully achieve long-term follow-up. Thus, PURE included sites in which investigators  
16 are committed to collecting good-quality data for a low-budget study over the planned 10-year follow-up period and  
17 did not aim for a strict proportionate sampling of the entire world. The following countries and territories participate  
18 in the PURE study: Argentina, Bangladesh, Brazil, Canada, Chile, China, Colombia, Ecuador, India, Iran,  
19 Kazakhstan, Kyrgyzstan, Malaysia, Pakistan, Palestine, Peru, Philippines, Poland, Russia, Saudi Arabia, South  
20 Africa, Sweden, Tanzania, Turkey, United Arab Emirates, Uruguay, Zimbabwe.

21  
22 **Selection of Communities**

23 Within each country, urban and rural communities were selected based on broad guidelines (see Guidelines for  
24 Selection of Countries, Communities, Households, and Individuals Recruited to PURE). A common definition for  
25 “community” that is applicable globally is difficult to establish. In PURE, a community was defined as a group of  
26 people who have common characteristics and reside in a defined geographic area. A city or large town was not  
27 usually considered a single community, rather communities from low-, middle-, and high-income areas were  
28 selected from sections of the city and the community area defined according to a geographical measure (e.g., a set of  
29 contiguous postal code areas or a group of streets or a village). The primary sampling unit for rural areas in many  
30 countries was the village. The reason for inclusion of both urban and rural communities is that for many countries,  
31 urban and rural environments exhibit distinct characteristics in social and physical environment, and hence, by  
32 sampling both, we ensured considerable variation in societal factors across PURE communities.

33  
34 The number of communities selected in each country varied, with the aim to recruit communities with substantial  
35 heterogeneity in social and economic circumstances balanced against the capacity of local investigators to maintain  
36 follow-up. In some countries (e.g., India, China, Canada, and Colombia), communities from several states/provinces  
37 were included to capture regional diversity, in policy, socioeconomic status, culture, and physical environment. In  
38 other countries (e.g. Iran, Poland, Sweden, and Zimbabwe), fewer communities were selected.

39  
40 **Selections of Households and Individuals**

41 Within each community, sampling was designed to achieve a broadly representative sample of that community of  
42 adults aged between 35 and 70 years. The choice of sampling frame within each center was based on both  
43 “representativeness” and feasibility of long-term follow-up, following broad study guidelines. Once a community  
44 was identified, where possible, common and standardized approaches were applied to the enumeration of  
45 households, identification of individuals, recruitment procedures, and data collection.

46  
47 The method of approaching households differed between regions. For example, in rural areas of India and China, a  
48 community announcement was made to the village through contact of a community leader, followed by in-person  
49 door-to-door visits of all households. In contrast, in Canada, initial contact was by mail followed by telephone  
50 inviting members of the households to a central clinic. Households were eligible if at least 1 member of the  
51 household was between the ages of 35 and 70 years and the household members intended to continue living in their  
52 current home for a further 4 years.

53  
54 For each approach, at least 3 attempts at contact were made. All individuals within these households between 35 and  
55 70 years providing written informed consent were enrolled. When an eligible household or eligible individual in a  
56 household refused to participate, demographics and self-reported data about CVD risk factors, education, and history  
57 of CVD, cancers and deaths in the households within the 2 previous years were recorded.

58  
59 To ensure standardization and high data quality, we used a comprehensive operations manual, training workshops,  
60 DVDs, regular communication with study personnel and standardized report forms. We entered all data in a  
61 customized database programmed with range and consistency checks, which was transmitted, electronically to the  
62 Population Health Research Institute in Hamilton (Ontario, Canada) where further quality checks were implemented.

63

64 **Guidelines for Selection of Countries, Communities, Households, and Individuals Recruited to PURE**

|                                                                                                                                                                                                                                                                                                                                                                                                        |
|--------------------------------------------------------------------------------------------------------------------------------------------------------------------------------------------------------------------------------------------------------------------------------------------------------------------------------------------------------------------------------------------------------|
| <b>Countries</b>                                                                                                                                                                                                                                                                                                                                                                                       |
| 1. High-income countries, middle-income countries, and low-income countries, with the bulk of the recruitment from low- and middle-income regions.                                                                                                                                                                                                                                                     |
| 2. Committed local investigators with experience in recruiting for population studies.                                                                                                                                                                                                                                                                                                                 |
| <b>Communities</b>                                                                                                                                                                                                                                                                                                                                                                                     |
| 1. Select both urban and rural communities. Use the national definition of the country to determine urban and rural communities.                                                                                                                                                                                                                                                                       |
| 2. Select rural communities that are isolated (distance of >50 km or lack easy access to commuter transportation) from urban centers. However, consider ability to process bloods samples, e.g., villages in rural developing countries should be within 45-min drive of an appropriate facility.                                                                                                      |
| 3. Define community to a geographical area, e.g., using postal codes, catchment area of health service/clinics, census tracts, areas bordered by specific streets or natural borders such as a river bank.                                                                                                                                                                                             |
| 4. Consider feasibility for long-term follow-up, e.g., for urban communities, choose sites that have a stable population such as residential colonies related to specific work sites in developing countries. In rural areas, choose villages that have a stable population. Villages at greater distance from urban centers are less susceptible to large migration to urban centers.                 |
| 5. Enlist a community organization to facilitate contact with the community, eg, in urban areas, large employers (government and private), insurance companies, clubs, religious organizations, clinic or hospital service regions. In rural areas, local authorities such as priests or community elders, hospital or clinic, village leader, or local politician.                                    |
| <b>Individual</b>                                                                                                                                                                                                                                                                                                                                                                                      |
| 1. Broadly representative sampling of adults 35 to 70 years within each community unit.                                                                                                                                                                                                                                                                                                                |
| 2. Consider feasibility for long-term follow-up when formulating community sampling framework, e.g., small percentage random samples of large communities may be more difficult to follow-up because they are dispersed by distance. In rural areas of developing countries that are not connected by telephone, it may be better to sample entire community (i.e., door-to-door systematic sampling). |

3. The method of approach of households/individuals may differ between sites. In MIC and HIC, mail, followed up by phone contact may be the practical first means of contact. In LIC, direct household contact through household visits may be the most appropriate means of first contact.

4. Once recruited, all individuals are invited to a study clinic to complete standardized questionnaires and have a standardized set of measurements.

65  
66

67 **PURE Data Collection Procedures**

68  
69 Data have been collected at national, community, household, and individual levels with standardized questionnaires  
70 (cite). Questions about age, sex, education, smoking status, hypertension, type 2 diabetes, and obesity were identical  
71 to those in the INTERHEART and INTERSTROKE studies.<sup>2,3</sup> We obtained blood pressure (BP) measurements in  
72 individuals and hypertension was defined as a BP >140/>90 mmHg or in individuals who were already receiving  
73 treatment. Fasting glucose was available in most individuals (76%) and type 2 diabetes was defined as those  
74 individuals reporting type 2 diabetes or those with a fasting plasma glucose  $\geq 7.0$  mmol/L or a HbA1c  $\geq 6.5\%$  or a 2-  
75 hour plasma glucose on oral glucose tolerance test  $\geq 11.1$  mmol/L. In most of the low-income countries (LIC) and  
76 medium-income countries (MIC) there was no central system of death or event registration. Therefore, to arrive at a  
77 probable diagnosis or cause of death, we (1) obtained information on prior medical illness and medically certified  
78 causes of death, where available, or (2) captured the best available information from reliable sources when medical  
79 information was not available. Event documentation was based on information from household interviews and medical  
80 records, death certificates and other sources. We also used Verbal Autopsies to ascertain cause of death in addition to  
81 medical records, which were reviewed by a health professional. This approach has been used in several studies  
82 conducted in LIC and MIC.

83  
84 To ensure a standard approach and accuracy for the classification of events across all countries and over time, the first  
85 100 CVD events (deaths, myocardial infarction (MI), strokes, heart failure (HF)) for China and India, and 50 cases  
86 for other countries were adjudicated locally and by the adjudication chair. If necessary, further training was provided.  
87 Every year thereafter, 50 cases for China and India and 25 cases for each of the remaining countries were adjudicated  
88 as above.

89  
90 The standard operating procedure of the PURE study with regard to collection and storage consisted of drawing fasting  
91 and non-fasting blood samples from individuals. Samples were subsequently separated into six equal volumes, and  
92 frozen immediately at  $-20^{\circ}\text{C}$  or  $-70^{\circ}\text{C}$  after processing. Samples were shipped in nitrogen vapor tanks from every site  
93 to a blood storage site, where they were stored at  $-160^{\circ}\text{C}$  in liquid nitrogen (Hamilton). Samples from China, India,  
94 Turkey and Malaysia are kept locally because of legislations prohibiting export of biological specimens. Blood  
95 samples were previously analyzed for total cholesterol, HDL cholesterol, apoB, apoA1 and glycated hemoglobin.

96

97 **Selection for the Case-Cohort Analysis**

98 This PURE biomarker analysis is a subsample/sub-study of the original PURE study. Eligibility for the biomarker  
99 analysis in PURE needed to maximize the opportunity for assessing novel protein and genetic markers of risk in a  
100 statistically appropriate manner, while doing so in a manner that was cost-effective from the perspective of genotyping  
101 and multiplex biomarker analysis. As such, the case-cohort design was deemed the most reasonable design. Eligibility  
102 at the outset was determined in the following manner:

103 **Inclusion criteria**

- 104 - Member of a major ethnicity in a residing country (i.e. European Caucasian in Sweden)
- 105 - Blood sample available for biomarker and genetic analysis

106 **Exclusion criteria**

- 107 - Country does not allow export of biological sample (China, India, Turkey, Malaysia) \*
- 108 - Non-fasting blood only, or missing/inadequate blood sample
- 109 \* Future targeted validation/replication studies may be possible.

110  
111  
112 Among the ~55,000 PURE participants with biological specimen stored at our institution locally, “cases” (those not  
113 in sub-cohort) were selected if they had at least one major adverse health event , including myocardial infarction  
114 (MI), stroke, heart failure (HF), type 2 diabetes (T2D) or death (from all causes, including cardio-vascular diseases).  
115 Corresponding members of the ‘control’ group were selected by frequency-matching according to major country  
116 specific ethnicity. This procedure is described as follows:

- 117  
118 (1) Incident MI, stroke, HF, T2D, and death were tabulated by major country-specific ethnicity.
- 119  
120 (2) The number of controls to be selected in each major country-specific ethnicity is the sum of the adverse health  
121 events mentioned above. This approach guaranteed that all cases (by country and ethnicity) had matched controls.
- 122  
123 (3) Among the 55,246 PURE participants with biological specimen stored at PHRI, **a random sample of subjects**  
124 **equal to the controls counted in step 2 was selected in each major country-specific ethnicity.** Importantly, *selected*  
125 *controls may have had adverse health events as per case-cohort design.*
- 126  
127 (4) After this initial selection process, 12,066 participants were deemed eligible prior to proteomic quality control  
128 measures (described further in further detail below)
- 129  
130 (5) A subsequent selection process was undertaken, where individuals whose measurements did not meet quality  
131 control standards was undertaken. This yielded 11,287 participants. In other words, after running samples through  
132 the proteomics platform 779 participants (12,066 – 11,287), were further deemed ineligible for analysis.
- 133

134  
135  
136  
137  
138  
139  
140

**PURE Subjects meeting eligibility criteria = 55,246**

**Randomly sampled for sub-**

**participants**



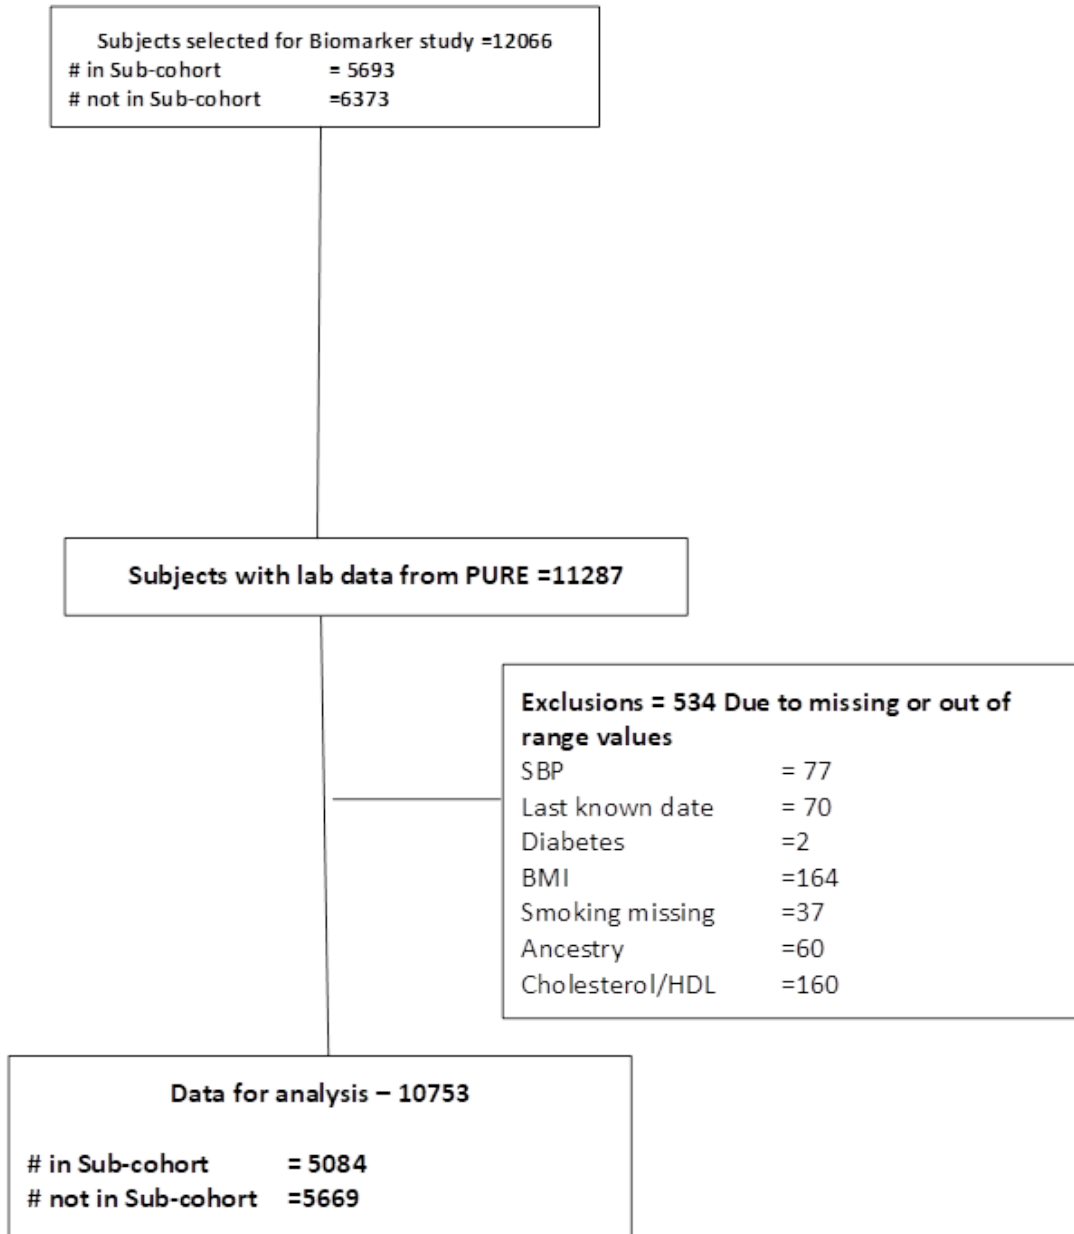

141

142

143 **PURE Biomarker Sub-study Case-Cohort Sampling Depiction:**  
 144

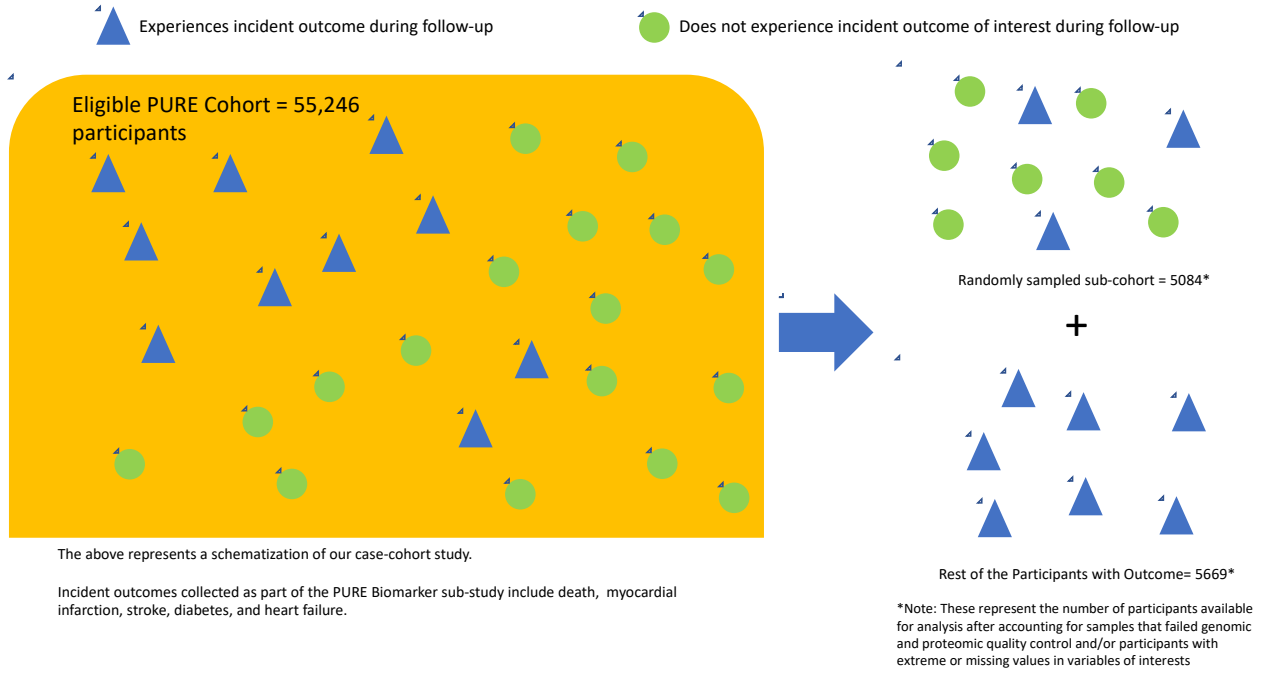

145  
 146

147

148 **Standardized Event Definitions in PURE**

149 **Prospective Follow-up for Cardiovascular Events and Mortality:** History of disease was collected at baseline  
150 from every participant with standardized questionnaires regarding history of a) hypertension, b) diabetes c) stroke d)  
151 angina/myocardial infarction/coronary artery disease e) heart failure f) other heart disease.

152 Information on specific events (death, myocardial infarction, stroke, heart failure, cancer, hospitalizations, new  
153 diabetes, injury, tuberculosis, human immunodeficiency viral infections, malaria, pneumonia, asthma, chronic  
154 obstructive pulmonary disease) were obtained from participants or their family members (events were reported by  
155 the participants if alive or by a relative if the individual had died). This information was adjudicated centrally in  
156 each country by trained physicians using standardized definitions. Because the PURE study involves urban and rural  
157 areas from middle- and low-income countries, supporting documents to confirm cause of death and/or event varied  
158 in degrees of completion and availability. In most of middle- and low-income countries there was no central system  
159 of death or event registration. Therefore, information was obtained about prior medical illness and medically  
160 certified cause of death where available, and, second, best available information was captured from reliable sources  
161 in those instances where medical information was not available in order to be able to arrive at a probable diagnosis  
162 or cause of death. Event documentation was based on information from household interviews and medical records,  
163 death certificates and other sources. Verbal autopsies were also used to ascertain cause of death in addition to  
164 medical records which were reviewed by a health professional. This approach has been used in several studies  
165 conducted in middle- and low-income countries.

166 To ensure a standard approach and accuracy for classification of events across all countries and over time, the first  
167 100 CVD events (deaths, MI, strokes, heart failure or cancers) for China and India, and 50 cases for other countries  
168 were adjudicated both locally and also by the adjudication chair, and if necessary further training was provided.  
169 Thereafter, every year, 50 cases for China and India and 25 cases for each of the remaining countries were  
170 adjudicated as above.

171

172 **FATAL EVENTS**

173 **Cardiovascular Death – Definitions**

174 01.00 DEATH DUE TO CARDIOVASCULAR EVENTS

175 01.10 Sudden unexpected Cardiovascular Death (SCVD)

176 Without evidence of other cause of death, death that occurred suddenly and unexpectedly (examples: witnessed  
177 collapse, persons resuscitated from cardiac arrest who later died) or persons seen alive less than 12 hours prior to  
178 discovery of death (example persons found dead in his/her bed).

- 179 • SCVD is either definite, probable or possible according to the following characteristics:

| PURE<br>Adjudication<br>Code | Event Type | Acceptable<br>ICD-10<br>codes |
|------------------------------|------------|-------------------------------|
|------------------------------|------------|-------------------------------|

|                                                                                                                                                                                                                                      |                                                                                                                                                                                                                                                                                                                                                                                                                                                |                |
|--------------------------------------------------------------------------------------------------------------------------------------------------------------------------------------------------------------------------------------|------------------------------------------------------------------------------------------------------------------------------------------------------------------------------------------------------------------------------------------------------------------------------------------------------------------------------------------------------------------------------------------------------------------------------------------------|----------------|
| 01·11: Definite                                                                                                                                                                                                                      | <p>One of the following in persons with:</p> <ul style="list-style-type: none"> <li>• known cardiovascular disease, or</li> <li>• diabetes with an additional risk factor such as hypertension, smoking, dyslipidemia, micro albuminuria, serum creatinine 50% above upper limit of normal, or</li> <li>• 3 of the above risk factors, or</li> <li>• 2 of the above risk factors in men aged 60 and more and women aged 65 and more</li> </ul> | No ICD-10 Code |
| 01·12: Probable                                                                                                                                                                                                                      | <p>One of the following in persons with:</p> <ul style="list-style-type: none"> <li>• diabetes, or</li> <li>• 2 of the above risk factors in men aged less than 60 and in women less than 65, or</li> <li>• one of the above risk factor in men aged 60 and more and in women aged 65 and more, or</li> <li>• typical of chest pain or sudden severe dyspnea of less than 20-minute duration preceding the event</li> </ul>                    |                |
| 01·13: Possible                                                                                                                                                                                                                      | In persons without risk factor                                                                                                                                                                                                                                                                                                                                                                                                                 |                |
| <p><i>For SCVD, the patient was well or had a stable CVD (example stable angina) when last seen alive. The event of a sudden death occurring during the hospitalization of MI is considered a fatal MI and not sudden death.</i></p> |                                                                                                                                                                                                                                                                                                                                                                                                                                                |                |

180

181 01·30 Fatal Myocardial Infarction (MI)

182 Symptoms of Myocardial Infarction:

183 Typical symptoms or suggestive symptoms of MI according to physician are characterized by severe anterior chest  
 184 pain as tightness, crushing, burning, lasting at least 20 minutes, occurring at rest, or on exertion, that may radiate to  
 185 the arms or neck or jaw and may be associated with dyspnea, diaphoresis and nausea. However, death associated  
 186 with nausea and vomiting with or without chest pain not due to another cause may be considered as possible MI if  
 187 ECG and cardiac markers are not done. These symptoms may have occurred the last month before death.

188 Fatal myocardial infarction is either definite, probable or possible according to the following characteristics:

| PURE Adjudication Code | Event Type | Acceptable ICD-10 codes |
|------------------------|------------|-------------------------|
|------------------------|------------|-------------------------|

|                 |                                                                                                                                                                                                                                                                                                                                                                                                                                                                                                                                                                                                                                                          |          |
|-----------------|----------------------------------------------------------------------------------------------------------------------------------------------------------------------------------------------------------------------------------------------------------------------------------------------------------------------------------------------------------------------------------------------------------------------------------------------------------------------------------------------------------------------------------------------------------------------------------------------------------------------------------------------------------|----------|
| 01-31: Definite | <ol style="list-style-type: none"> <li>1. Autopsy demonstrating fresh myocardial infarction and/or recent coronary occlusion, or</li> <li>2. ECG showing new and definite sign of MI (Minnesota code 1-1-1) or</li> <li>3. Symptoms typical or atypical or inadequately described but attributed to cardiac origin lasting at least 20 minutes and by troponin or cardiac enzymes (CKMB, CK, SGOT, SLDH) above center laboratory ULN</li> <li>4. ECG with new ischemic changes (new ST elevation/depression or T wave inversion <math>\geq 2</math> mm) and by troponin or cardiac enzymes (CKMB, CK, SGOT, SLDH) above center laboratory ULN</li> </ol> |          |
| 01-32: Probable | <ol style="list-style-type: none"> <li>1. ECG with sign of probable MI (Minnesota code 1-2-1), or</li> <li>2. Typical symptoms lasting at least 20 minutes considered of cardiac origin, with only new ST-T changes (new ST elevation/depression or T wave inversion <math>\geq 1</math> but <math>&lt; 2</math>mm) without documented increased cardiac markers or enzyme as in PURE definition 1-31 (above), or</li> <li>3. Increased cardiac enzymes as in PURE definition 1-31 (above) showing a typical pattern of MI as above without symptoms or significant ECG changes</li> </ol>                                                               | I21- I22 |
| 01-33: Possible | <ol style="list-style-type: none"> <li>1. ECG with sign of possible MI (Minnesota code 1-3-1) or</li> <li>2. Typical symptoms or symptoms suggestive of MI according to the physician lasting at least 20 minutes without documented ECG or cardiac marker.</li> </ol>                                                                                                                                                                                                                                                                                                                                                                                   |          |

189

190 The Minnesota codes for MI is taken from Rose and Blackburn and published in their book “Evaluation Methods of  
191 Cardiovascular Disease WHO 1969”.

192 • Definite MI is Q/R ratio  $\geq 1/3$  and Q duration  $\geq 0.03$  second in one of the following leads: I, II, V2, 3, 4, 5,  
193 6. (code 1-1-1)

194 • Probable MI is Q/R ratio  $\geq 1/3$  and Q duration between 0.02 and 0.03 second in one of the following leads:  
195 I, II, V2, 3, 4, 5, 6. (code 1-2-1)

196 • Possible MI is Q/R ratio between 1/5 and 1/3 and Q duration between 0.02 and 0.03 second in one of the  
197 following leads: I, II, V2, 3, 4, 5, 6. (code 1-3-1)

198

199 01-40 Fatal Stroke

200 Fatal stroke is either definite or possible according to the following characteristics:

| PURE<br>Adjudication<br>Code | Event Type                                                                                                                                                                                                                                                                                                                                                                                                                                                                                                                                                                                                                                                                                                                                                                                                                                                                                                                                                                                                                                                                                                                                                                                                                                                                                                                                   | Acceptable<br>ICD-10<br>codes |
|------------------------------|----------------------------------------------------------------------------------------------------------------------------------------------------------------------------------------------------------------------------------------------------------------------------------------------------------------------------------------------------------------------------------------------------------------------------------------------------------------------------------------------------------------------------------------------------------------------------------------------------------------------------------------------------------------------------------------------------------------------------------------------------------------------------------------------------------------------------------------------------------------------------------------------------------------------------------------------------------------------------------------------------------------------------------------------------------------------------------------------------------------------------------------------------------------------------------------------------------------------------------------------------------------------------------------------------------------------------------------------|-------------------------------|
| 01·41: Definite              | <p>Stroke death is defined as death within 30 days from an acute focal neurological deficit <i>diagnosed by a physician</i> and thought to be of vascular origin (without other cause such as brain tumor) with signs and symptoms lasting <math>\geq</math> 24 hrs.</p> <p>Stroke death is also considered if death occurred within 24 hrs. of onset of persisting signs and symptoms, or if there is evidence of a recent stroke on autopsy.</p> <p>N.B.</p> <ul style="list-style-type: none"> <li>• In a subject with a stroke <math>\leq</math> 30 days: If death occurred with a pneumonia due to possible aspiration, death will be considered to be due to stroke.</li> <li>• In a subject with a stroke <math>&gt;</math> 30 days: If death occurred with a pneumonia due to possible aspiration, the adjudicator will make a decision according to his/her clinical judgment if death is related to stroke or not.</li> <li>• Subarachnoid hemorrhage death manifested by sudden onset headache with/without focal signs and imaging (CT or MRI) evidence of bleeding primarily in the subarachnoid space is considered a fatal stroke in absence of trauma or brain tumor or malformation</li> <li>• Subdural hematoma death is not considered as a stroke death and may be related to previous trauma or other cause.</li> </ul> | I60- I64,<br>I69              |
| 01·43: Possible              | Death in a participant with a history of sudden onset of focal neurological deficit of one or more limbs, loss of vision or slurred speech lasting about 24 hours.                                                                                                                                                                                                                                                                                                                                                                                                                                                                                                                                                                                                                                                                                                                                                                                                                                                                                                                                                                                                                                                                                                                                                                           |                               |

201

202 01·50 Fatal Congestive Heart Failure

203 Fatal congestive heart failure is either definite or possible according to the following characteristics:

| PURE<br>Adjudication<br>Code | Event Type | Acceptable<br>ICD-10 codes |
|------------------------------|------------|----------------------------|
|                              |            |                            |

|                 |                                                                                                                                                                                                                                                                                                                                                                                                                                                                                                                                                                                                                                   |     |
|-----------------|-----------------------------------------------------------------------------------------------------------------------------------------------------------------------------------------------------------------------------------------------------------------------------------------------------------------------------------------------------------------------------------------------------------------------------------------------------------------------------------------------------------------------------------------------------------------------------------------------------------------------------------|-----|
| 01·51: Definite | <p>The diagnosis of congestive heart failure may be an autopsy finding in absence of other cause or requires signs (rales, increased jugular venous pressure or ankle edema) or symptoms (nocturnal paroxysmal dyspnea, dyspnea at rest or ankle edema) of congestive heart failure and one or both of the following:</p> <ul style="list-style-type: none"> <li>• radiological signs of pulmonary congestion,</li> <li>• treatment of heart failure with diuretics</li> </ul> <p><i>If sudden death occurred in a patient with chronic severe heart failure, it should be adjudicated as fatal congestive heart failure.</i></p> | I50 |
| 01·52: Probable | Progressive shortness of breath on lying down or at night, improving on sitting up AND any of the following signs or symptoms: swelling of feet, distension of abdomen, progressive cough in a person with known hypertension or a history of previous MI/angina or other heart disease                                                                                                                                                                                                                                                                                                                                           |     |
| 01·53: Possible | Progressive shortness of breath on lying down or at night, improving on sitting up AND any of the following signs or symptoms: swelling of feet, distension of abdomen, progressive cough                                                                                                                                                                                                                                                                                                                                                                                                                                         |     |

204

205 01·60 Death Due to Other Cardiovascular Deaths (*other causes [1·10 to 1·50 above] having been excluded*)

| PURE Adjudication Code | Event Type                                                                                                                                                                                                                                                                                       | Acceptable ICD-10 codes |
|------------------------|--------------------------------------------------------------------------------------------------------------------------------------------------------------------------------------------------------------------------------------------------------------------------------------------------|-------------------------|
| 01·61                  | Arterial rupture of aneurysm                                                                                                                                                                                                                                                                     | I71- I72                |
| 01·62                  | Pulmonary embolism<br><i>NOTE: Death associated with pulmonary embolism occurring within 2 weeks after a fracture such as hip, femur should attributed to death due to injury. Refer to Injury, Section 6·0</i>                                                                                  | I26                     |
| 01·63                  | Arrhythmic death (A-V block, sustained ventricular tachycardia in absence of other causes)                                                                                                                                                                                                       | I44- I45,<br>I47- I49   |
| 01·64                  | Death after invasive cardiovascular intervention: a perioperative death extending to 30 days after coronary or arterial surgical revascularization and to 7 days after a coronary or arterial percutaneous dilatation (angioplasty) with or without a stent or an invasive diagnostic procedure. | I97                     |

|       |                                                                                                                                                                                                                                                                                                            |                                                                                                                     |
|-------|------------------------------------------------------------------------------------------------------------------------------------------------------------------------------------------------------------------------------------------------------------------------------------------------------------|---------------------------------------------------------------------------------------------------------------------|
| 01·65 | Congenital heart disease                                                                                                                                                                                                                                                                                   | Q20-Q28                                                                                                             |
| 01·66 | Heart valve disease (including rheumatic heart disease)                                                                                                                                                                                                                                                    | I01, I05- I09,<br>I34- I37                                                                                          |
| 01·67 | Endocarditis                                                                                                                                                                                                                                                                                               | I33, I38                                                                                                            |
| 01·68 | Myocarditis                                                                                                                                                                                                                                                                                                | I40                                                                                                                 |
| 01·69 | Tamponade (pericarditis)                                                                                                                                                                                                                                                                                   | I30, I31, I32                                                                                                       |
| 01·70 | Other cardiovascular events ( <i>Excluding 1·61 to 1·69 above</i> )<br><br><i>Valid ICD-10 codes would include the following:</i><br><br><i>I11, I12, I13, I23, I24, I25, I27, I28, I42, I51, I52, I65-I68, I73, I74, I96, I98, I99 (Refer to ICD-10 Listing for associated definitions for each code)</i> | Any valid 'I' (Cardiovascular) ICD-10 code that can be classified as underlying cause of death, not specified above |

206

207 NON-FATAL EVENTS

208 Cardiovascular Events – Definitions

209 10·00 NON-FATAL CARDIOVASCULAR EVENTS

210 10·10 Non-Periprocedural Myocardial Infarction (MI)

211 MI is considered either definite, probable or possible according to the following characteristics:

212

| PURE Adjudication Code | Event Type                                                                                                                                                                                                                                                                                                                                   | Acceptable ICD-10 codes |
|------------------------|----------------------------------------------------------------------------------------------------------------------------------------------------------------------------------------------------------------------------------------------------------------------------------------------------------------------------------------------|-------------------------|
| 10·11: Definite        | <ol style="list-style-type: none"> <li>1. ECG showing new and definite sign of MI (Minnesota code 1-1-1) or</li> <li>2. Symptoms typical or atypical or inadequately described but attributed to cardiac origin lasting at least 20 minutes and by troponin or cardiac enzymes (CKMB, CK, SGOT, SLDH) above center laboratory ULN</li> </ol> |                         |



|                 |                                                                                                                                                                                                                                                                                                                                                                                                                                                                                                                                                         |         |
|-----------------|---------------------------------------------------------------------------------------------------------------------------------------------------------------------------------------------------------------------------------------------------------------------------------------------------------------------------------------------------------------------------------------------------------------------------------------------------------------------------------------------------------------------------------------------------------|---------|
|                 | <p>3. ECG with new ischemic changes (new ST elevation/depression or T wave inversion <math>\geq 2</math> mm) and by troponin or cardiac enzymes (CKMB, CK, SGOT, SLDH) above center laboratory ULN</p> <p>Please note that increased markers may occur in trauma (CK, AST, myoglobin and CK MB to a lesser degree); renal insufficiency, heart failure, pulmonary embolism (troponin), cardioversion (all)</p>                                                                                                                                          |         |
| 10·12: Probable | <ol style="list-style-type: none"> <li>1. ECG with new and probable sign of MI (Minnesota code 1-2-1), or</li> <li>2. Typical symptoms lasting at least 20 minutes considered of cardiac origin, with only new ST-T changes (new ST elevation/depression or T wave inversion <math>\geq 1</math> but <math>&lt; 2</math>mm) without documented increased cardiac markers as in PURE definition 10·11 (above), or</li> <li>3. Increased cardiac enzymes showing a typical pattern of MI as above without symptoms or significant ECG changes.</li> </ol> | I21-I22 |
| 10·13: Possible | <ol style="list-style-type: none"> <li>1. ECG with new and possible sign of MI (Minnesota code 1-3-1), or</li> <li>2. Typical symptoms lasting 20 minutes and more considered to be of cardiac origin without documented ECG or cardiac marker.</li> </ol>                                                                                                                                                                                                                                                                                              |         |

213

214

215

216 10·20 Periprocedural Myocardial Infarction

| PURE Adjudication Code | Event Type                                                                                                                                                                                                                                                                                                                                                                                                                                                                                                                                                                                                                                                                                                                      | Acceptable ICD-10 codes |
|------------------------|---------------------------------------------------------------------------------------------------------------------------------------------------------------------------------------------------------------------------------------------------------------------------------------------------------------------------------------------------------------------------------------------------------------------------------------------------------------------------------------------------------------------------------------------------------------------------------------------------------------------------------------------------------------------------------------------------------------------------------|-------------------------|
| 10·21: Definite        | <ol style="list-style-type: none"> <li>1. ECG showing new and definite sign of MI (Minnesota code 1-1-1), or</li> <li>2. Increased cardiac markers within 48 hours of procedure: <ul style="list-style-type: none"> <li>• percutaneous coronary intervention: CKMB should be <math>\geq 5</math> X ULN or troponin <math>\geq 5</math> X above lower level of necrosis OR <math>&gt; 20\%</math> increase in cardiac markers if elevated at the beginning of the procedure in a patient with symptoms suggestive of myocardial ischemia</li> <li>• Coronary surgery: Increased cardiac markers CKMB should be <math>\geq 10</math>X ULN or troponin <math>\geq 10</math>X above lower limit of necrosis.</li> </ul> </li> </ol> | I21-I22                 |

217

218 The Minnesota codes for MI is taken from Rose and Blackburn and published in their book “Evaluation Methods of  
219 Cardiovascular Disease WHO 1969”.

220 • Definite MI is Q/R ratio  $\geq 1/3$  and Q duration  $\geq 0.03$  second in one of the following leads: I, II, V2, 3, 4, 5,  
221 6. (code 1-1-1)

222 • Probable MI is Q/R ratio  $\geq 1/3$  and Q duration between 0.02 and 0.03 second in one of the following leads:  
223 I, II, V2, 3, 4, 5, 6. (code 1-2-1)

224 • Possible MI is Q/R ratio between 1/5 and 1/3 and Q duration between 0.02 and 0.03 second in one of the  
225 following leads: I, II, V2, 3, 4, 5, 6. (code 1-3-1)

226 10.30 Stroke/Transient Ischemic Attack (TIA)

| PURE Adjudication Code | Event Type                                                                                                                                                                                                                                                                                                                                                                                                                                                                                                                                                                                                                                                                     | Acceptable ICD-10 codes |
|------------------------|--------------------------------------------------------------------------------------------------------------------------------------------------------------------------------------------------------------------------------------------------------------------------------------------------------------------------------------------------------------------------------------------------------------------------------------------------------------------------------------------------------------------------------------------------------------------------------------------------------------------------------------------------------------------------------|-------------------------|
| 10.31: Definite        | Stroke is defined as an acute focal neurological deficit <i>diagnosed by a physician</i> and thought to be of vascular origin (without other case such as brain tumor) with signs and symptoms lasting $\geq 24$ hrs.<br><br>N.B. <ul style="list-style-type: none"> <li>Subarachnoid hemorrhage manifested by sudden onset headache with/without focal signs and imaging (CT or MRI or lumbar puncture) showing evidence of bleeding primarily in the subarachnoid space is considered a stroke in absence of trauma or brain tumor or malformation</li> <li>Subdural hematoma is not considered as a stroke and may be related to previous trauma or other cause.</li> </ul> | I60-I64, I69            |
| 10.33: Possible        | Stroke is possible if there is a history of sudden onset of focal neurological deficit of one or more limbs, loss of vision or slurred speech lasting about 24 hours or more                                                                                                                                                                                                                                                                                                                                                                                                                                                                                                   |                         |
| 10.34: TIA             | The diagnosis of TIA requires the presence of acute focal neurological deficit thought to be of vascular origin with signs and symptoms lasting less than 24 hours                                                                                                                                                                                                                                                                                                                                                                                                                                                                                                             | G45                     |

227

228 10.40 Congestive Heart Failure

| PURE | Event Type | Acceptable ICD-10 codes |
|------|------------|-------------------------|
|      |            |                         |

| Adjudication Code |                                                                                                                                                                                                                                                                                                                                                                                                                          |     |
|-------------------|--------------------------------------------------------------------------------------------------------------------------------------------------------------------------------------------------------------------------------------------------------------------------------------------------------------------------------------------------------------------------------------------------------------------------|-----|
| 10·41: Definite   | <p>The diagnosis of congestive heart failure requires signs (rales, increased jugular venous pressure or ankle edema) or symptoms (nocturnal paroxysmal dyspnea, dyspnea at rest or ankle edema) of congestive heart failure and one or both of the following:</p> <ul style="list-style-type: none"> <li>• radiological signs of pulmonary congestion,</li> <li>• Treatment of heart failure with diuretics.</li> </ul> | 150 |
| 10·42: Probable   | <p>Progressive shortness of breath on lying down or at night, improving on sitting up AND any of the following signs or symptoms: swelling of feet, distension of abdomen, progressive cough in a person with known hypertension or a history of previous MI/angina or other heart disease</p>                                                                                                                           |     |
| 10·43: Possible   | <p>Congestive heart failure is considered possible when there is progressive shortness of breath on lying down or at night, improving on sitting up AND any of the following signs or symptoms: swelling of feet, distension of abdomen, progressive cough</p>                                                                                                                                                           |     |

## 229 Additional notes on Statistical Methods

230 While 12,066 individuals were considered eligible at the outset, following proteomic quality control, an additional  
231 779 samples were considered unsuitable for analysis. As such, this case-cohort study includes 11,287 participants  
232 from PURE study. These 779, because they were not suitable for analysis, were deemed ineligible for analysis and  
233 as such were believed to have no impact with regards to biasing final estimates. Among these 11,287, a total of 534  
234 subjects were excluded from the study sample (subjects with missing or out of range values in systolic blood  
235 pressure, diabetes or smoking status at baseline, BMI, ancestry, last known date and subjects with out of range total  
236 cholesterol or HDL). We imputed Total cholesterol, HDL, LDL and triglycerides. The missing data pattern was  
237 arbitrary and we used PROC MI to generate 5 imputed data sets with ‘FCS’ (fully conditional specification) method.  
238 We used sex as a classification variable and the data were imputed using age, sex and ancestry. In order to adjust for  
239 the effects of antihypertensive medication on systolic blood pressure, we added 15mmHg to the measured systolic  
240 blood pressure.<sup>4,5</sup> In order to account for the effects of cholesterol lowering medication on blood lipid  
241 concentrations, all individuals on lipid lowering medications were corrected in the following manner: total  
242 cholesterol/0·8 and LDL/0·7. HDL and triglycerides were not adjusted.<sup>6</sup>

243  
244 For the analysis of ACE2 determinants, coefficients of the ordinary least squares regression were pooled using  
245 Rubin’s rules. The adjusted R<sup>2</sup> for the final model (which included age, sex, smoking, BMI, ancestry, diabetes,  
246 blood pressure, and LDL cholesterol) was 0·199. For each cardiovascular outcome and mortality outcome, case-  
247 cohort analyses were performed using weighted proportional hazard model and used Self and Prentice weights.  
248 PROC MIANLYZE was used to pool the estimates to account for the variability introduced by imputations. The  
249 association measure was presented as a hazard ratio per 1 standard deviation (SD) unit increase in the marker,  
250 adjusted for the following: age, sex, smoking, BMI, systolic blood pressure, non-HDL cholesterol, and geographic  
251 ancestry. Each outcome was also adjusted for diabetes status, however, in the diabetes analysis, individuals with  
252 confirmed diabetes status were excluded. We assess the proportionality assumption using Schoenfeld Residual plots  
253 over time. Final effect estimates of ACE2 relationship with outcomes are presented with sex, non-HDL cholesterol  
254 and BMI as time dependent covariates to the model as these covariates violates the assumption.

255  
256 Variable Ranking:

257 Predictors were ranked on the basis of a likelihood ratio chi square statistic. Variable rankings were performed on  
258 the first imputed dataset generated. We began by fitting the full model. In this, the full model was fit and compared  
259 to the model without each variable. For example, the full model was compared to the same model without non-HDL  
260 cholesterol in order to obtain a chi-square statistic. Subsequently, the full model was compared to the model without  
261 sex. This was done iteratively for each variable.

## 262 **Ethical Considerations**

263 All Centers are required to obtain approval from their respective ethics committees (Institutional Review Boards). All  
264 subjects' data are confidential and only authorized individuals will have access to study related documents at study  
265 Centers. Subjects' identification will be protected for documents (e.g. CRF) transmitted to the Coordinating Office,  
266 as well as biomarker and genetic data. Informed consent to obtain the baseline information, to collect and store the  
267 genetic and other biological specimens was obtained from all individuals.  
268

## 269 **ACE2 Assay Validation**

270 Plasma ACE2 levels were measured by proximity extension assay using the Olink Proseek Cardiovascular II96×96  
271 (CVDII) reagent kit (Olink, Uppsala, Sweden), which enable the analysis of 92 CVD-related proteins across 96  
272 individual samples simultaneously. Analytical performance of this panel has been previously validated and can be  
273 found elsewhere (<https://www.olink.com/products/cvd-ii-panel/>). Briefly, coefficient of variation (CV) of the ACE2  
274 assay calculated from linearized NPX values over the limit of detection, is of 8% for the intra-assay (within-run)  
275 precision, and of 11% for the inter-assay (between-run) precision. Intra-assay CV <10% and inter-assay CV <15% are  
276 considered as optimal (PMID: 12414755). The validated analytical range for ACE2 is from 15·26pg/mL to  
277 62·5ng/mL.

## 278 **ACE2 Data Quality Controls**

279 Quality controls of biomarker data generated through the CVDII panel, including ACE2, were evaluated in four steps.  
280 First, biomarkers were pre-processed using the NPX Manager, a built-in Olink software for quality control. Participant  
281 samples were spiked with 4 internal quality controls, including 2 incubation controls, 1 extension control, and 1  
282 amplification/detection control that monitored assay performance. 3 external controls, including an inter-plate control,  
283 a negative control, and a pool plasma sample were also included in each plate to monitor for inter- and intra-plate  
284 precision. Samples with at least one internal control that deviated more than  $\pm 0.3$  NPX units from the plate median  
285 were flagged and excluded from further analyses. Overall, 649 samples were excluded with a pass quality control rate  
286 of 94·8% for this panel. An additional 611 samples (5%) were also identified to have ACE2 levels below the lower  
287 limit of quantification (ie. 15·26pg/mL for ACE2). These samples were flagged but retained in following analyses.  
288 Second, inter-plate normalization was performed to minimize technical sources of variation between plates. This was  
289 achieved by calculating the plate-specific median and overall lot median across all samples. Biomarker levels were  
290 subsequently centralized to the overall lot median by taking the difference between the measured biomarker level and  
291 the plate-specific median and adding it to the overall median.

292 Third, the distribution of ACE2 was scrutinized as follows. The shape of the distribution was quantified using  
293 skewness and kurtosis metrics. Next, the modality of the distribution was assessed using the Hartigan dip test.<sup>7</sup>  
294 Differences in the mean, median, and distribution of levels between sex, ethnic group, and reagent lot were  
295 examined. It should be noted that the participant cohort was analyzed using two different reagent lots. As such,  
296 quantile normalization was applied to each reagent lot separately and later combined to minimize potential batch  
297 effects. Olink provides data on the sensitivity of individual biomarker assays in the CVDII panel to contamination  
298 by plasma or serum hemolysate. We defined a biomarker to be hemolysis-sensitive if assay performance was

299 affected by 5mg/mL or less of haemolysate. ACE2 is not a haemolysis-sensitive biomarker. The mean, median, and  
300 distribution of ACE2 was then re-assessed to evaluate quality control performance.

301  
302  
303

### **Genetic Analysis**

304 Genotyping on the ThermoFisher Axiom Precision Medicine Research Array (r.3) was attempted for 11,683 PURE  
305 study participants consenting to research with suitable DNA quantities. 96-plex plates were scanned on the  
306 GeneTitan instrument, each including 95 PURE samples and a universal control sample shared across all study  
307 plates. Genotype calling was performed according to manufacturer's best practices using a combination of *Axiom*  
308 *Power Tools* and in-house scripts. Genotype calling was performed in three separate batches of approximately equal  
309 size (n1=3,778; n2=3,862; n3=3,781) grouping samples by the order in which plates were processed. As per  
310 manufacturer recommendations, samples were removed if they had low signal-to-noise contrast (Dish Quality  
311 Control < 0.82) or low quality control call rate (QCCR < 0.97).

### **Genotyping Quality Control**

313 Additional quality control procedures were implemented using PLINK, R, GCTA, and KING softwares with in-  
314 house scripts. Sample-level quality control checks included assessments of sample completeness (call rate > 0.95),  
315 potential sample mix-ups (discrepancies between reported vs. genetically determined sex and/or ethnicity), genetic  
316 duplicates, and sample contamination (excess heterozygosity). Genetically determined ancestry for PURE  
317 participants was derived via principal component analysis of directly genotyped common variants alongside a  
318 reference set of ancestrally diverse samples (1000Genomes). The top four principal components were plotted to  
319 assess clustering of genetic ancestry with self-reported ancestry. Samples exhibiting non-ambiguous discrepancies  
320 between genetic and self-reported ancestry were removed. Variant-level quality control checks included assessments  
321 of variant completeness (call rate > 0.985), plate and batch effects, non-Mendelian segregation within families  
322 (Mendelian errors), Hardy Weinberg Equilibrium deviations (HWE P-value < 1x10<sup>-5</sup>), and variant frequency (minor  
323 allele frequency > 0). After sample and variant quality control procedures, 11,112 samples and 749,783 variants  
324 remained. The average genotyping call rate among passing samples was 0.996535.

### **Imputation Quality Control**

326 For phasing and imputation of genotypes, the 749,783 directly genotyped variants in 11,112 samples were  
327 uploaded to a cloud imputation server hosted by the Sanger Wellcome Trust Institute  
328 (<https://imputation.sanger.ac.uk/>). Genotypes were phased using EAGLE2 and then imputed using PBWT for  
329 95,270,199 variants on the 1000Genomes and UK10K combined reference panel. Quality control of imputed  
330 genotypes included removal of variants with: (i) poor imputation quality (INFO<0.30), (ii) violations of Hardy  
331 Weinberg equilibrium (P<1x10<sup>-5</sup>), and (ii) low allele frequency (MAF<0.01). After quality control of imputed  
332 genotypes, 2 variants remained. 10,480 (94%) out of the 11,112 samples passing genotyped QC also had passing  
333 ACE2 measurements, which were used for all subsequent genetic analyses.

### **Mendelian Randomization Analyses**

335 Mendelian Randomization analysis is conventionally applied to assess causal effects of circulating biomarkers on  
336 disease outcomes with the intent of identifying causal mediators of disease that may represent effective therapeutic  
337 targets ("forward Mendelian Randomization"), but extensions such as "reverse Mendelian Randomization" may  
338 allow for more specific and sensitive diagnostic biomarkers for disease.<sup>8</sup> We extend this framework to  
339 understanding how antecedents of cardiovascular disease may causally affect circulating ACE2 levels. We  
340 conducted Mendelian Randomization analyses for the subset of modifiable clinical risk factors associated with

341 ACE2 levels in the cross-sectional PURE analyses, specifically: body mass index, systolic blood pressure, diabetes  
342 status, smoking status.

### 343 *Genetic Variant Selection*

344 Common genetic variants (minor allele frequency > 0.01) that were strongly associated with clinical risk factors  
345 ( $P < 5 \times 10^{-8}$ ) in large European genome-wide association studies were selected as proxies for clinical risk factors.  
346 Genetic variants associated with body mass index were derived from Yengo *et al.* (N~700,000)<sup>9</sup>; systolic blood  
347 pressure were derived within the UKBiobank study (N~400,000)<sup>10</sup>, diabetes status derived from Mahajan *et al.*  
348 (N=1,232,901)<sup>11</sup> and smoking initiation status were derived from Liu *et al.* (N=1,232,091).<sup>12</sup> Beta coefficients (or  
349 log(odds) for discrete risk factors) and standard errors were extracted for each variant.

### 350 *Harmonization of External Genetic Datasets with PURE*

351 The impact of the pre-selected variants on circulating ACE2 levels was ascertained through a genome-wide  
352 association study within a subset of 8699 PURE participants. To mitigate the confounding effect of ethnicity on  
353 genetic variation, genetic analyses were restricted to PURE participants of self-reported Latin (n=4058), European  
354 (n=3372), or Persian (n=1269) ancestry. African (n=659), South Asian (n=604), East Asian (n=314), and Arab  
355 (n=204) participants were excluded from the present analyses because harmonization of PURE with external genetic  
356 datasets, which are primarily comprised of European individuals presently, necessitated exclusion of non-European  
357 groups. Self-identified Latin and Persian individuals were included in the present genetic analyses because these  
358 groups genetically overlap with Europeans. Furthermore, to gauge the transferability of genetically predicted risk  
359 factors across these ethnic groups in PURE, we demonstrate similarly strong predictions across European, Latin, and  
360 Persian subgroups with a polygenic risk score derived using European weights (Supplementary Table 5).

361 Pre-selected genetic variants were cross-referenced against the PURE variant set, and matching variants shared  
362 between PURE and the external dataset were retained. To account for correlation between genetic variants, variants  
363 were first prioritized based on statistical significance and then proximal SNPs correlated with the index variant at ( $r^2$   
364 > 0.01 in 1000Genomes Europeans) were iteratively removed to generate an independent set of genetic variants.  
365 This process was repeated separately for each clinical risk factor to maximize retention of suitable genetic  
366 instruments.

367 For the remaining independent set of genetic variants present in both external and internal genetic datasets, we  
368 conducted genetic association testing within PURE to derive their corresponding effects on plasma ACE2 levels (i.e.  
369 outcome betas). The GCTA mixed linear model association with leave-one-chromosome-out method was used  
370 assuming an additive model. Covariates included age, sex, recruitment centre, season in which the blood specimen  
371 was collected, blood specimen storage time, OLINK processing batch, genotype calling batch, and 10 intra-ethnic  
372 genetic principal components. GWAS were conducted separately for European (n=3372), Latin (n=4058), and  
373 Persian (n=1269) participants and then combined via inverse-variance-weighted fixed effects meta-analysis with the  
374 METAL software.

### 375 *Mendelian Randomization Framework*

376 Two-sample Mendelian Randomization analyses were conducted wherein the effects of genetic variants on the  
377 exposure (i.e. clinical risk factors from external datasets) were obtained from independent datasets from outcome  
378 effects (i.e. circulating ACE2 levels within PURE). All MR testing was conducted in R using the TwoSampleMR  
379 package (v.0.5.2). Several complementary MR methods were employed including: Inverse Variance Weighted  
380 (IVW), Median Weighted, and MR-EGGER regression methods. The IVW method has the greatest statistical power  
381 but also makes the most assumptions. Accordingly, MR effect estimates were reported from the IVW model in the

382 main manuscript only when there were no signs of pleiotropic confounding (horizontal, directional or idiosyncratic).  
383 Potential for pleiotropic confounding, whereby an instrument influences the outcome via a mechanism beyond the  
384 exposure's mediating effect, was detected using the Cochran's Q and MR-PRESSO tests for global heterogeneity  
385 and the EGGER intercept test for directional pleiotropy. The impact of outlying variants (idiosyncratic pleiotropy)  
386 on distorting the overall causal effect estimate was evaluated by inspection of leave-one-out-analyses plots and MR-  
387 PRESSO. MR-PRESSO testing was run using 1000 simulations; outliers detected by MR-PRESSO were removed  
388 and the causal effects were re-estimated without outliers using the aforementioned MR methods. If significant global  
389 heterogeneity persisted after outlier removal, the median weighted MR estimate was reported; if directional  
390 pleiotropy persisted, the EGGER-regression MR estimate was reported. To facilitate comparison with  
391 epidemiological effect estimates, MR effect estimates were scaled to the same units when possible (i.e. body mass  
392 index: per 5 kg/m<sup>2</sup> increase; systolic blood pressure: per 10 mm Hg increase; diabetes and smoking status: mean  
393 difference between cases and controls).

#### 394 *Impact of Common Antihypertensive Drugs on Circulating ACE2*

395 We also applied the same Mendelian Randomization framework to assess the effects of common blood pressure-  
396 lowering medications on circulating ACE2 levels. Genetic variants approximating the effects of antihypertensive  
397 medication were selected according to previously derived instruments.<sup>13,14</sup> Specifically, genetic variants (i) were  
398 located proximally to the genes encoding the therapeutic protein targets and (ii) demonstrated association with  
399 circulating protein levels (ACE) and/or blood pressure (ACE/CCB/BB). MR effect estimates were scaled to a 10  
400 mmHg reduction in systolic blood pressure for CCB and BB; for ACE inhibitors, results were expressed per 1 SD  
401 decrease in circulating ACE levels.

#### 402 *Sensitivity Analyses*

403 We conducted a series of sensitivity analyses to assess the robustness of MR results. First, to more sensitively  
404 identify potential pleiotropic SNPs, we searched phenoscanner for genome-wide significant variants laying outside  
405 the intended causal pathway and then repeated MR analyses excluding such variants. Second, we excluded cases  
406 with cardiovascular disease or diabetes (N=5234) at baseline and reperformed association testing of genetic  
407 instruments on circulating ACE2 levels in this disease-free subcohort (N=3465). Third, we conducted MR analyses  
408 using a more stringent pairwise r<sup>2</sup> threshold of 0.001 as opposed to 0.01. Fourth, we conducted MR analyses using  
409 ethnicity-specific effects on ACE2 levels to evaluate consistency of MR effect estimates across ethnic groups or  
410 conversely population-specific effects.

411

412 Supplementary Appendix 2: Additional Results -- Supplementary Tables

413 **Supplementary Table 1:** Subgroup Analysis to Assess Heterogeneity of Effect of ACE2 on Cardiovascular  
 414 Outcomes\*  
 415

| Sub group        | Number of events in the sub-cohort | Number of events outside the sub-cohort | HR (95% CI)*       | P for interaction |
|------------------|------------------------------------|-----------------------------------------|--------------------|-------------------|
|                  | N                                  | N                                       |                    |                   |
| Diabetes         | .                                  | .                                       |                    |                   |
| Yes              | 65                                 | 335                                     | 1.10 (0.94 - 1.30) | 0.068             |
| No               | 198                                | 1188                                    | 1.25 (1.15 - 1.36) |                   |
| Age              | .                                  | .                                       |                    |                   |
| Age <55 years    | 88                                 | 503                                     | 1.13 (1.02 - 1.26) | 0.080             |
| Age ≥ 55         | 175                                | 1020                                    | 1.28 (1.16 - 1.41) |                   |
| Obese            | .                                  | .                                       |                    |                   |
| Yes (BMI ≥ 30)   | 82                                 | 475                                     | 1.21 (1.07 - 1.37) | 0.659             |
| No (BMI < 30)    | 181                                | 1048                                    | 1.24 (1.13 - 1.35) |                   |
| Genetic ancestry | .                                  | .                                       |                    |                   |
| African          | 28                                 | 57                                      | 1.36 (1.08 - 1.72) | 0.703             |
| Arab             | 8                                  | 27                                      | 0.89 (0.45 - 1.76) |                   |
| East Asian       | 5                                  | 63                                      | 1.72 (1.17 - 2.53) |                   |
| Latin            | 109                                | 658                                     | 1.23 (1.11 - 1.37) |                   |
| Persian          | 27                                 | 152                                     | 1.18 (0.96 - 1.46) |                   |
| South Asian      | 36                                 | 128                                     | 1.21 (0.95 - 1.54) |                   |
| European         | 50                                 | 438                                     | 1.14 (0.97 - 1.34) |                   |
| Sex              | .                                  | .                                       |                    |                   |
| Female           | 115                                | 649                                     | 1.21 (1.09 - 1.34) | 0.654             |
| Male             | 148                                | 874                                     | 1.23 (1.11 - 1.37) |                   |

416  
 417 \*An exploratory analysis was carried out examining possible heterogenous effect across subgroups as it relates to  
 418 the cardiovascular outcomes (defined by fatal and non-fatal myocardial infarction, stroke, heart failure, or another  
 419 fatal cardiovascular disease). In order to account for multiple hypothesis testing, a subgroup required a p-value of  
 420  $0.05/5 = 0.01$  to account for the 5 interaction tests being carried out. Models are adjusted for age, sex, geographic  
 421 ancestry, smoking, diabetes, body mass index, systolic blood pressure, and non-HDL cholesterol excluding the  
 422 subgroup variable from the model.  
 423



424 **Supplementary Table 2:** Comparisons of the associations of ACE 2 and other common continuous risk factors  
 425 using minimally Adjusted Standardized Coefficients (per SD)  
 426

| <b>Outcome</b>          | <b>HR (95% CI) Death*</b> | <b>HR (95% CI) Cardiovascular Death*</b> | <b>HR (95% CI) Non-CVD death*</b> | <b>HR (95% CI) Myocardial Infarction*</b> | <b>HR (95% CI) Stroke*</b> | <b>HR (95% CI) Heart Failure*</b> | <b>HR (95% CI) Diabetes*</b> |
|-------------------------|---------------------------|------------------------------------------|-----------------------------------|-------------------------------------------|----------------------------|-----------------------------------|------------------------------|
| Plasma ACE2             | 1.41 ( 1.34 - 1.49)       | 1.52 ( 1.38 - 1.68)                      | 1.38 ( 1.30 - 1.46)               | 1.37 ( 1.27 - 1.48)                       | 1.32 ( 1.21 - 1.45)        | 1.43 ( 1.25 - 1.65)               | 1.68 ( 1.59 - 1.77)          |
| Systolic Blood Pressure | 1.11 ( 1.06 - 1.17)       | 1.32 ( 1.22 - 1.43)                      | 1.03 ( 0.98 - 1.09)               | 1.26 ( 1.18 - 1.35)                       | 1.60 ( 1.48 - 1.72)        | 1.48 ( 1.31 - 1.67)               | 1.44 ( 1.36 - 1.51)          |
| non HDL Cholesterol     | 0.98 ( 0.93 - 1.03)       | 1.11 ( 1.01 - 1.21)                      | 0.93 ( 0.88 - 0.99)               | 1.25 ( 1.17 - 1.35)                       | 1.16 ( 1.07 - 1.26)        | 1.03 ( 0.90 - 1.18)               | 1.27 ( 1.21 - 1.34)          |
| BMI                     | 1.02 ( 0.97 - 1.07)       | 1.20 ( 1.09 - 1.32)                      | 0.95 ( 0.90 - 1.01)               | 1.30 ( 1.21 - 1.40)                       | 1.15 ( 1.05 - 1.25)        | 1.37 ( 1.20 - 1.55)               | 2.08 ( 1.99 - 2.18)          |

427  
 428 \*Coefficients are hazard ratios per 1 standard deviation increase. Each coefficient presented is minimally adjusted  
 429 (for age, sex, ancestry). For example, the HR presented for ACE2 is adjusted for age, sex, and ancestry only. The  
 430 HR presented for blood pressure is adjusted for age, sex, and ancestry only. Continuous risk factors were selected in  
 431 order to place all variables on a common interpretable scale (per 1 SD) increase. In all mortality related outcomes,  
 432 ACE2 had the strongest association with the outcome. These results align with the order of our variable ranking  
 433 plots presented in the main paper.  
 434

435  
436  
437  
438

**Supplementary Table 3:** Split Sample Estimation of ACE2 Relationship With Cardiovascular Outcomes and Mortality

| Outcome             | Training sample                      |                                    |                                         |                                     | Validation sample                    |                                    |                                         |                                     |
|---------------------|--------------------------------------|------------------------------------|-----------------------------------------|-------------------------------------|--------------------------------------|------------------------------------|-----------------------------------------|-------------------------------------|
|                     | Number of subjects in the sub-cohort | Number of events in the sub-cohort | Number of events outside the sub-cohort | HR (95% CI) per 1 SD Fully adjusted | Number of subjects in the sub-cohort | Number of events in the sub-cohort | Number of events outside the sub-cohort | HR (95% CI) per 1 SD Fully adjusted |
|                     | N                                    | N                                  | N                                       |                                     | N                                    | N                                  | N                                       |                                     |
| All cause mortality | 2542                                 | 136                                | 856                                     | 1.39 ( 1.29 - 1.49)                 | 2542                                 | 152                                | 841                                     | 1.32 ( 1.22 - 1.42)                 |
| CVD death           | 2542                                 | 41                                 | 234                                     | 1.37 ( 1.19 - 1.57)                 | 2542                                 | 46                                 | 240                                     | 1.45 ( 1.26 - 1.66)                 |
| Non CVD death       | 2542                                 | 95                                 | 622                                     | 1.40 ( 1.28 - 1.52)                 | 2542                                 | 106                                | 601                                     | 1.28 ( 1.17 - 1.40)                 |
| MI                  | 2542                                 | 73                                 | 376                                     | 1.26 ( 1.13 - 1.41)                 | 2542                                 | 52                                 | 381                                     | 1.18 ( 1.05 - 1.32)                 |
| Stroke              | 2542                                 | 39                                 | 307                                     | 1.16 ( 1.02 - 1.32)                 | 2542                                 | 56                                 | 261                                     | 1.26 ( 1.10 - 1.44)                 |
| Heart failure       | 2542                                 | 16                                 | 115                                     | 1.35 ( 1.11 - 1.65)                 | 2542                                 | 22                                 | 111                                     | 1.17 ( 0.95 - 1.44)                 |
| Diabetes            | 2301                                 | 126                                | 731                                     | 1.47 ( 1.36 - 1.59)                 | 2283                                 | 119                                | 739                                     | 1.41 ( 1.30 - 1.53)                 |

439  
440  
441  
442  
443

We performed a random split estimation of the independent non-overlapping samples. We find that our associations remain consistent and significant across the data splits, with the exception of heart failure whose effect loses statistical significance likely due to the smaller number of heart failure events in the study.

444 **Supplementary Table 4:** Impact of Cardiovascular Disease Adjustment on Risk Factor and Demographic  
 445 Factors on ACE2 Concentration

| <b>Variable</b>                 | <b>Beta in Model Without CVD Adjustment (95% CI)</b> | <b>Beta in Model With Cardiovascular Disease History Adjustment</b> |
|---------------------------------|------------------------------------------------------|---------------------------------------------------------------------|
| Sex (Baseline: Female)          | 0.58 (0.54, 0.61)                                    | 0.58 (0.54, 0.61)                                                   |
| Ancestry (Baseline: European)   |                                                      |                                                                     |
| South Asian                     | -0.12 (-0.21, -0.04)                                 | -0.12 (-0.20, -0.04)                                                |
| Arab                            | 0.06 (-0.06, 0.18)                                   | 0.06 (-0.06, 0.18)                                                  |
| Persian                         | 0.12 (0.06, 0.17)                                    | 0.11 (0.06, 0.17)                                                   |
| Latin                           | 0.29 (0.25, 0.33)                                    | 0.29 (0.25, 0.33)                                                   |
| African                         | 0.46 (0.38, 0.54)                                    | 0.46 (0.39, 0.54)                                                   |
| East Asian                      | 0.57 (0.46, 0.68)                                    | 0.57 (0.46, 0.68)                                                   |
| BMI, per 5 kg/m <sup>2</sup>    | 0.12 (0.10, 0.14)                                    | 0.12 (0.10, 0.14)                                                   |
| Diabetes (Baseline: None)       | 0.29 (0.23, 0.34)                                    | 0.28 (0.23, 0.34)                                                   |
| Age, per decade                 | 0.10 (0.08, 0.12)                                    | 0.10 (0.08, 0.12)                                                   |
| SBP, per 10 mmHg                | 0.039 (0.03, 0.05)                                   | 0.038 (0.03, 0.05)                                                  |
| Smoking (Baseline: Ever Smoker) | -0.11 (-0.15, -0.08)                                 | -0.11 (-0.15, -0.07)                                                |
| LDL-c, per mmol/L               | 0.027 (0.01, 0.05)                                   | 0.026 (0.01, 0.05)                                                  |

446  
 447 We performed the cross-sectional multivariable regression analysis of ACE2 determinants and found no change in  
 448 effects after controlling for cardiovascular disease status.  
 449

450 **Supplementary Table 5: Impact of Variable Ranking Metric on ACE2 Rank**  
 451

|                                                 | Total Mortality | Cardiovascular Death | Non-Cardiovascular Death | Heart Failure | Myocardial Infarction | Stroke |
|-------------------------------------------------|-----------------|----------------------|--------------------------|---------------|-----------------------|--------|
| Likelihood Ratio based rank (Chi-sq statistic)  | 1 (133)         | 1 (45)               | 1 (90)                   | 3 (11)        | 3 (25)                | 3 (15) |
| Lin Ying estimate based rank (Chi-sq statistic) | 1 (68)          | 1 (33)               | 1 (50)                   | 3 (8)         | 3 (18)                | 3 (12) |

452  
 453 We performed additional analyses for ranking ACE2 on the basis of the absolute magnitude of the Chi-square  
 454 statistic. Different ranking metrics yielded the same results as it related to the relative rank of ACE2 compared to  
 455 clinical risk factors.

456  
457  
458  
459

**Supplementary Table 6:** Results of Mendelian Randomization Analyses of Clinical Risk Factors vs. circulating ACE2 levels.

| Trait                          | MR Method                        | # Variants | Beta         | 95% CI               | MR P-value      | Cochran's Q Heterogeneity P-value | MR-PRESSO Heterogeneity P-value | Egger Intercept P-value |
|--------------------------------|----------------------------------|------------|--------------|----------------------|-----------------|-----------------------------------|---------------------------------|-------------------------|
| <b>Body Mass Index</b>         | <b>Inverse variance weighted</b> | <b>631</b> | <b>0·18</b>  | <b>0·09-0·26</b>     | <b>3·92E-05</b> | <b>0·19</b>                       | <b>0·18</b>                     | <b>0·31</b>             |
| Body Mass Index                | MR Egger                         | 631        | 0·30         | 0·26-0·33            | 0·02            | 0·19                              | 0·18                            | 0·31                    |
| Body Mass Index                | Weighted median                  | 631        | 0·28         | 0·14-0·43            | 1·49E-04        | NA                                | 0·18                            | 0·31                    |
| Systolic Blood Pressure        | Inverse variance weighted        | 395        | 0·04         | -0·01 to 0·09        | 0·09            | 0·004                             | 0·002                           | 0·68                    |
| Systolic Blood Pressure        | MR Egger                         | 395        | 0·01         | -0·13 to 0·15        | 0·86            | 0·004                             | 0·002                           | 0·68                    |
| <b>Systolic Blood Pressure</b> | <b>Weighted median</b>           | <b>395</b> | <b>0·04</b>  | <b>-0·03 to 0·11</b> | <b>0·29</b>     | <b>NA</b>                         | <b>0·002</b>                    | <b>0·68</b>             |
| LDL Cholesterol*               | Inverse variance weighted        | 93         | -0·01        | -0·08 to 0·06        | 0·78            | 4·59x10 <sup>-4</sup>             | 0·001                           | 0·40                    |
| LDL Cholesterol*               | MR Egger                         | 93         | -0·05        | -0·16 to 0·07        | 0·41            | 4·46x10 <sup>-4</sup>             | 0·001                           | 0·40                    |
| <b>LDL Cholesterol*</b>        | <b>Weighted median</b>           | <b>93</b>  | <b>-0·02</b> | <b>-0·13 to 0·08</b> | <b>0·66</b>     | <b>NA</b>                         | <b>0·001</b>                    | <b>0·40</b>             |

|                           |                                  |            |             |                      |             |             |             |             |
|---------------------------|----------------------------------|------------|-------------|----------------------|-------------|-------------|-------------|-------------|
| <b>Smoking Initiation</b> | <b>Inverse variance weighted</b> | <b>103</b> | <b>0·37</b> | <b>-0·06 to 0·80</b> | <b>0·09</b> | <b>0·20</b> | <b>0·21</b> | <b>0·38</b> |
| Smoking Initiation        | MR Egger                         | 103        | 1·33        | -0·87 to 3·54        | 0·24        | 0·20        | 0·21        | 0·38        |
| Smoking Initiation        | Weighted median                  | 103        | 0·47        | -0·13 to 1·07        | 0·13        | NA          | 0·21        | 0·38        |
| <b>Type 2 Diabetes**</b>  | <b>Inverse variance weighted</b> | <b>247</b> | <b>0·29</b> | <b>0·05-0·52</b>     | <b>0·02</b> | <b>0·14</b> | <b>0·14</b> | <b>0·16</b> |
| Type 2 Diabetes**         | MR Egger                         | 247        | -0·05       | -0·57 to 0·47        | 0·85        | 0·16        | 0·14        | 0·16        |
| Type 2 Diabetes**         | Weighted median                  | 247        | 0·12        | -0·24 to 0·48        | 0·51        | NA          | 0·14        | 0·16        |

460  
461  
462  
463  
464  
465  
466  
467  
468  
469  
470  
471

Bolded font indicates the MR method selected for each trait considering the potential presence of heterogeneity or directional pleiotropy.

\* In the original MR analysis of LDL cholesterol, MR-PRESSO detected four SNP outliers (rs2642438, rs1169288, rs492602, rs2954029), which led to significant heterogeneity (Cochran Q and MR-PRESSO P-values < 0·001). While attenuated after removal, significant heterogeneity persisted (Cochran Q and MR-PRESSO P-values < 0·001).  
\*\*In the original MR analysis of T2D, MR-PRESSO detected two SNP outliers (rs61946386; rs56348580) which led to significant heterogeneity (Cochran Q and MR-PRESSO P-values < 0·001). Information presented in the table reflects MR results after outlier removal.

472 **Supplementary Table 7:** Results of Mendelian Randomization Analyses of Antihypertensive Agents vs. circulating  
 473 ACE2 levels.

| Trait                           | MR Method                        | # Variants | Beta         | 95% LCI      | 95% UCI     | MR P-value  | Cochran's Q Heterogeneity P-value | MR-PRESSO Heterogeneity P-value | Egger Intercept P-value |
|---------------------------------|----------------------------------|------------|--------------|--------------|-------------|-------------|-----------------------------------|---------------------------------|-------------------------|
| <b>ACE inhibitor</b>            | <b>Inverse variance weighted</b> | <b>16</b>  | <b>-0.01</b> | <b>-0.04</b> | <b>0.02</b> | <b>0.56</b> | <b>0.69</b>                       | <b>0.76</b>                     | <b>0.78</b>             |
| ACE inhibitor                   | MR Egger                         | 16         | -0.02        | -0.09        | 0.05        | 0.61        | 0.62                              | 0.76                            | 0.78                    |
| ACE inhibitor                   | Weighted median                  | 16         | -0.004       | -0.05        | 0.04        | 0.85        | NA                                | 0.76                            | 0.78                    |
| <b>Beta Blockers</b>            | <b>Inverse variance weighted</b> | <b>6</b>   | <b>0.31</b>  | <b>0.17</b>  | <b>0.80</b> | <b>0.21</b> | <b>0.33</b>                       | <b>0.24</b>                     | <b>0.63</b>             |
| Beta Blockers                   | MR Egger                         | 6          | -0.12        | 1.83         | 1.58        | 0.89        | 0.25                              | 0.24                            | 0.63                    |
| Beta Blockers                   | Weighted median                  | 6          | 0.36         | 0.24         | 0.96        | 0.24        | NA                                | 0.24                            | 0.63                    |
| <b>Calcium Channel Blockers</b> | <b>Inverse variance weighted</b> | <b>23</b>  | <b>0.25</b>  | <b>0.04</b>  | <b>0.54</b> | <b>0.09</b> | <b>0.13</b>                       | <b>0.13</b>                     | <b>0.14</b>             |
| Calcium Channel Blockers        | MR Egger                         | 23         | 0.73         | 0.06         | 1.40        | 0.05        | 0.19                              | 0.13                            | 0.14                    |
| Calcium Channel Blockers        | Weighted median                  | 23         | 0.29         | 0.12         | 0.70        | 0.16        | NA                                | 0.13                            | 0.14                    |

474 Bolded font indicates the MR method selected for each trait considering the potential presence of heterogeneity or  
 475 directional pleiotropy. Results for the ACE inhibitor analysis are expressed per 1 SD decrease in circulating ACE2  
 476 levels. Results are expressed per 10 mmHg decrease in systolic blood pressure except for ACE inhibitor analysis  
 477 which is expressed per 1 SD decrease in serum ACE concentration.

478

479 **Supplementary Table 8:** Association of European polygenic scores in PURE participants of European (n=3372),  
 480 Latin (n=4058), and Persian (n=1269) ethnicity

| EXPOSURE                    | # SNPs | TRAIT                                | SUBGROUP | EFFECT (Beta or Odds Ratio) | 95% CI    | P-value  | % Variance Explained |
|-----------------------------|--------|--------------------------------------|----------|-----------------------------|-----------|----------|----------------------|
| Systolic Blood Pressure PRS | 395    | Systolic Blood Pressure* (mmHg)      | EUROPEAN | 3.25                        | 2.61-3.89 | 5.49E-23 | 0.03                 |
|                             |        |                                      | LATIN    | 4.53                        | 3.77-5.29 | 3.19E-31 | 0.03                 |
|                             |        |                                      | PERSIAN  | 3.27                        | 2.03-4.50 | 2.76E-07 | 0.02                 |
| Body Mass Index PRS         | 631    | Body Mass Index (kg/m <sup>2</sup> ) | EUROPEAN | 1.15                        | 0.97-1.32 | 6.56E-37 | 0.05                 |
|                             |        |                                      | LATIN    | 0.93                        | 0.75-1.11 | 1.66E-24 | 0.03                 |
|                             |        |                                      | PERSIAN  | 1.07                        | 0.78-1.35 | 7.54E-13 | 0.05                 |
| Smoking Initiation PRS      | 103    | Smoker Status (Ever vs. Never)       | EUROPEAN | 1.21                        | 1.13-1.30 | 7.39E-08 | 0.01**               |
|                             |        |                                      | LATIN    | 1.04                        | 0.97-1.11 | 0.27     | 0.0005**             |
|                             |        |                                      | PERSIAN  | 1.44                        | 1.18-1.76 | 0.000334 | 0.03**               |
| Type 2 Diabetes PRS         | 247    | Diabetes Status                      | EUROPEAN | 1.66                        | 1.51-1.83 | 3.78E-24 | 0.06**               |
|                             |        |                                      | LATIN    | 1.57                        | 1.45-1.70 | 1.22E-28 | 0.05**               |
|                             |        |                                      | PERSIAN  | 1.48                        | 1.29-1.69 | 8.89E-09 | 0.05**               |

481 Effects are expressed as change in the trait per 1 standard deviation increase in the exposure PRS.

482 \*Systolic Blood Pressure adjusted for medication use (+15mmHg) as per Evangelou *et al*<sup>5</sup>.

483 \*\* Calculated using Nagelerke's R<sup>2</sup>

484



485 Supplementary Appendix 3: Additional Results – Supplementary Figures

486

487 **Supplementary Figure 1:** Difference in plasma ACE2 by blood pressure medication (Cross-sectional phenotypic  
488 analysis)

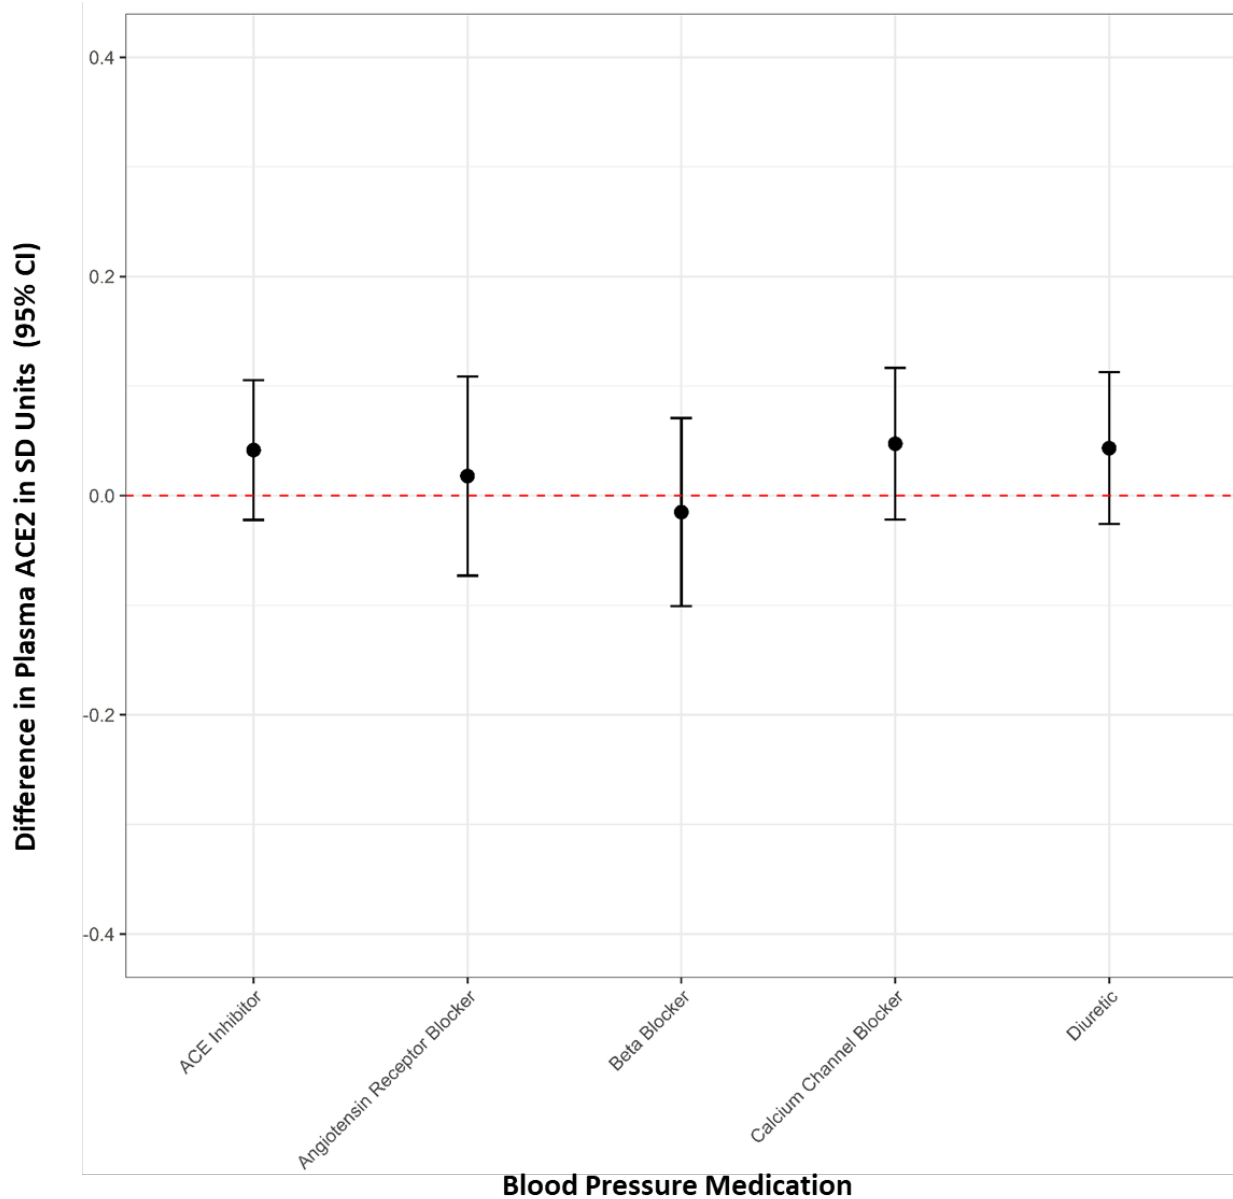

489

490 Supplementary Figure 1: The plot presents the adjusted coefficients (mutually adjusted for each other as well as age,  
491 sex, blood pressure, diabetes, smoking, diabetes, ancestry, and LDL cholesterol) for blood pressure medication on  
492 plasma ACE2 levels.

493

494

495 **Supplementary Figure 2:** Difference in plasma ACE2 concentration by ancestry

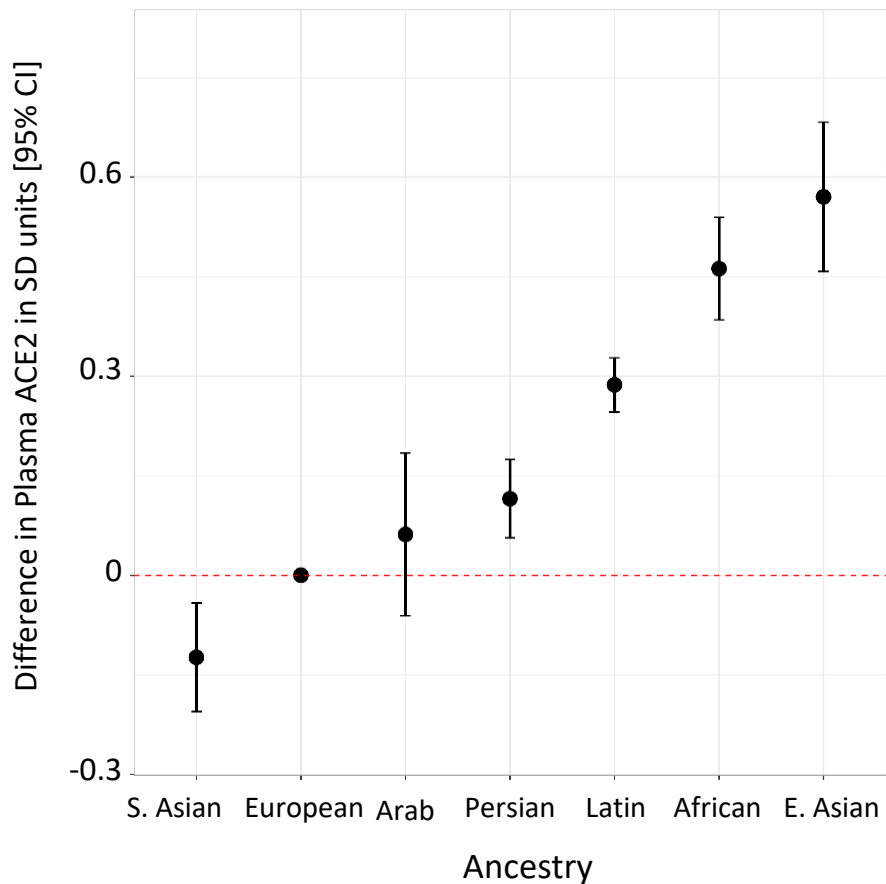

496

497 Supplemental Figure 2: Using European levels as the reference group, these adjusted coefficient plots show how  
498 each ancestral group varies with respect to ACE2 concentration. Estimates are adjusted for age, sex, blood pressure,  
499 LDL-c, BMI, smoking, and diabetes.

500 **Supplementary Figure 3: ACE2 Relationship with Overall Mortality**  
 501  
 502  
 503

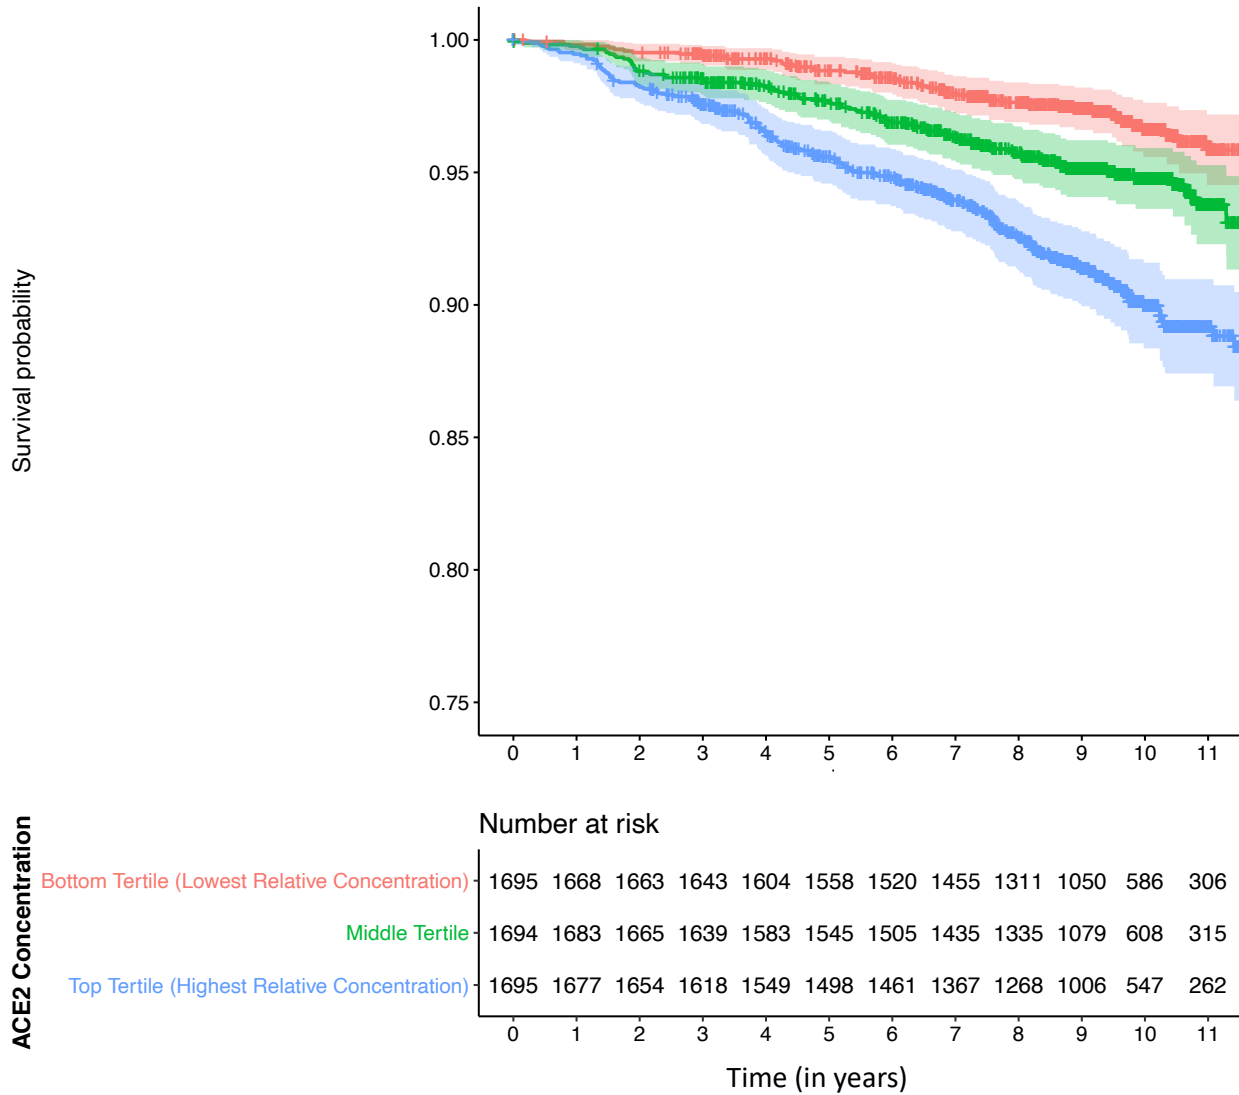

504  
 505 Supplementary Figure 3: Kaplan-Meier of total mortality assessed in the randomly sampled sub-cohort. ACE2  
 506 concentration was split in three tertiles. The dashed lines indicate participants who were censored. The red curve  
 507 corresponds to the lowest plasma ACE2 concentration level (the lowest tertile, n=1695; 50 death events), the green  
 508 curve corresponds to intermediate levels of ACE2 concentration (the middle tertile, n=1694; 86 death events), and  
 509 the blue curve corresponds to the highest plasma ACE2 concentration (the highest tertile, n=1695; 152 death  
 510 events). Individuals with higher concentrations of ACE2 had a higher rate of death relative to those with lower  
 511 concentrations of ACE2 (log rank p-value<0.0001).  
 512

513 **Supplementary Figure 4:** Comparison of MR estimates for clinical risk factors vs. ACE2 levels using the full  
514 PURE dataset (n=8699) vs. a healthy subset (members of the random subcohort with no history of CVD or diabetes)  
515 (n=3465)  
516

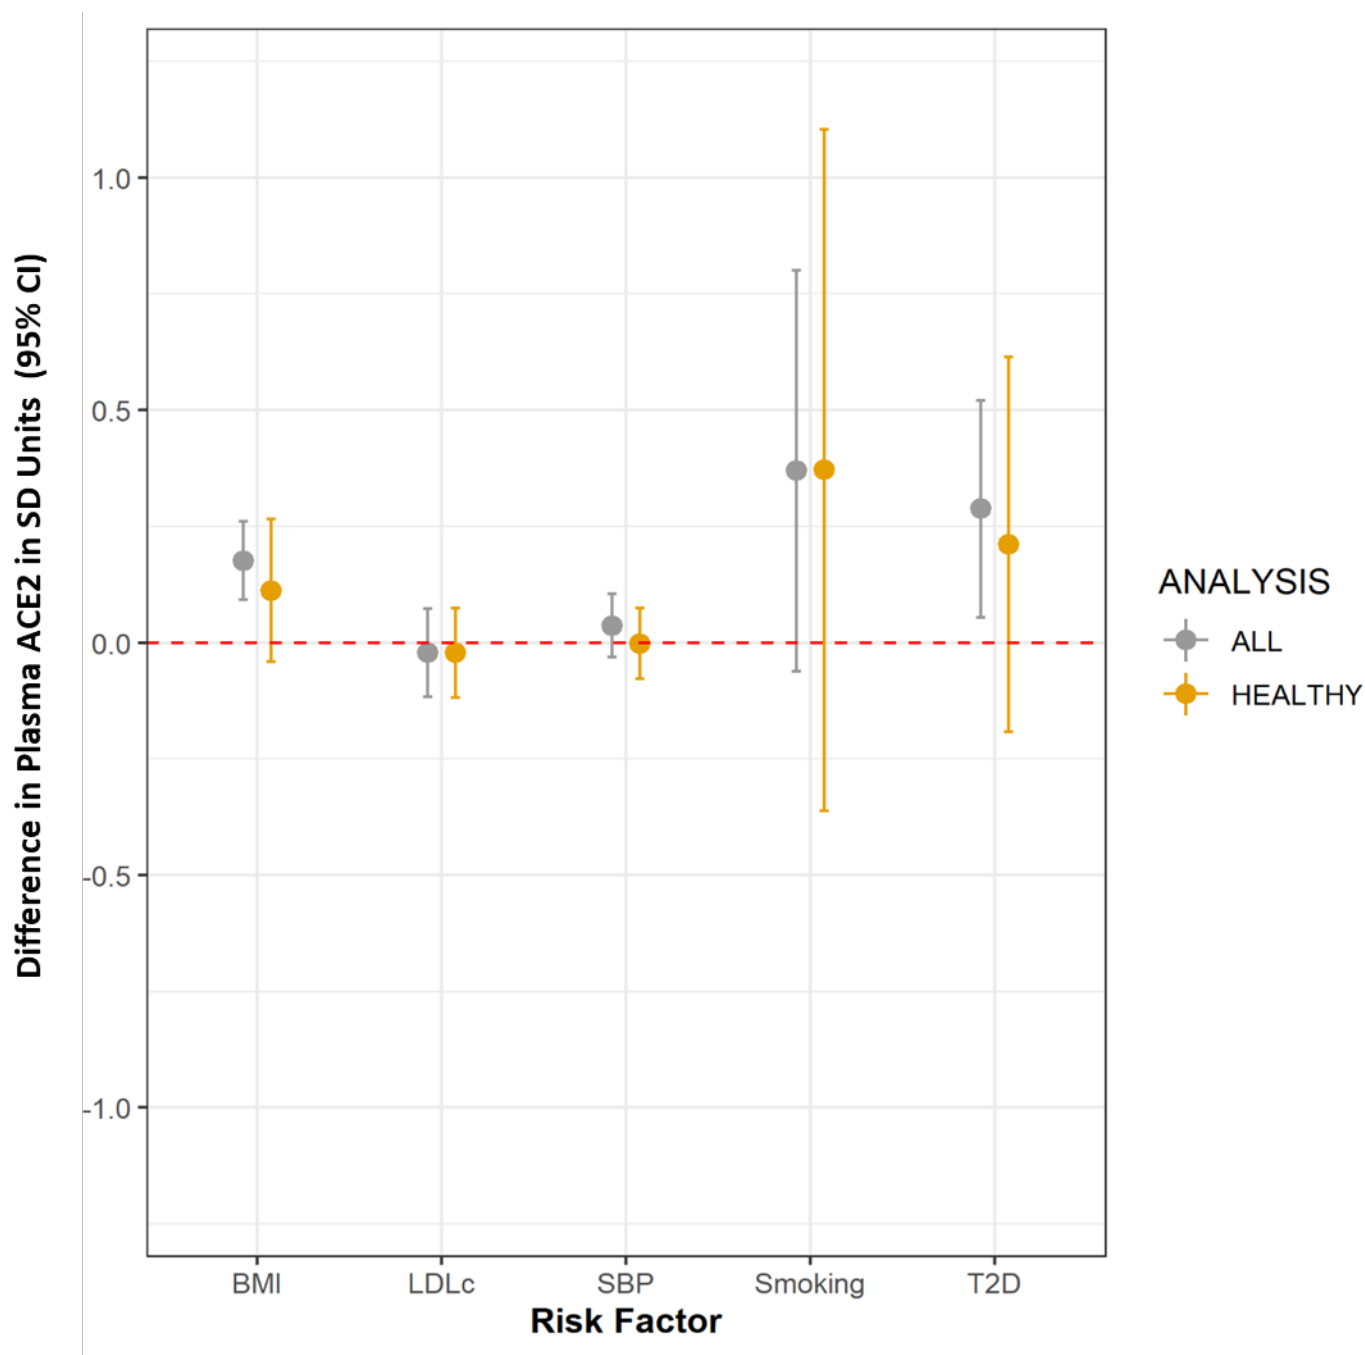

517  
518  
519  
520

521 **Supplementary Figure 5.** Quantile-Quantile Plot for the GWAS Meta-analysis of ACE2.

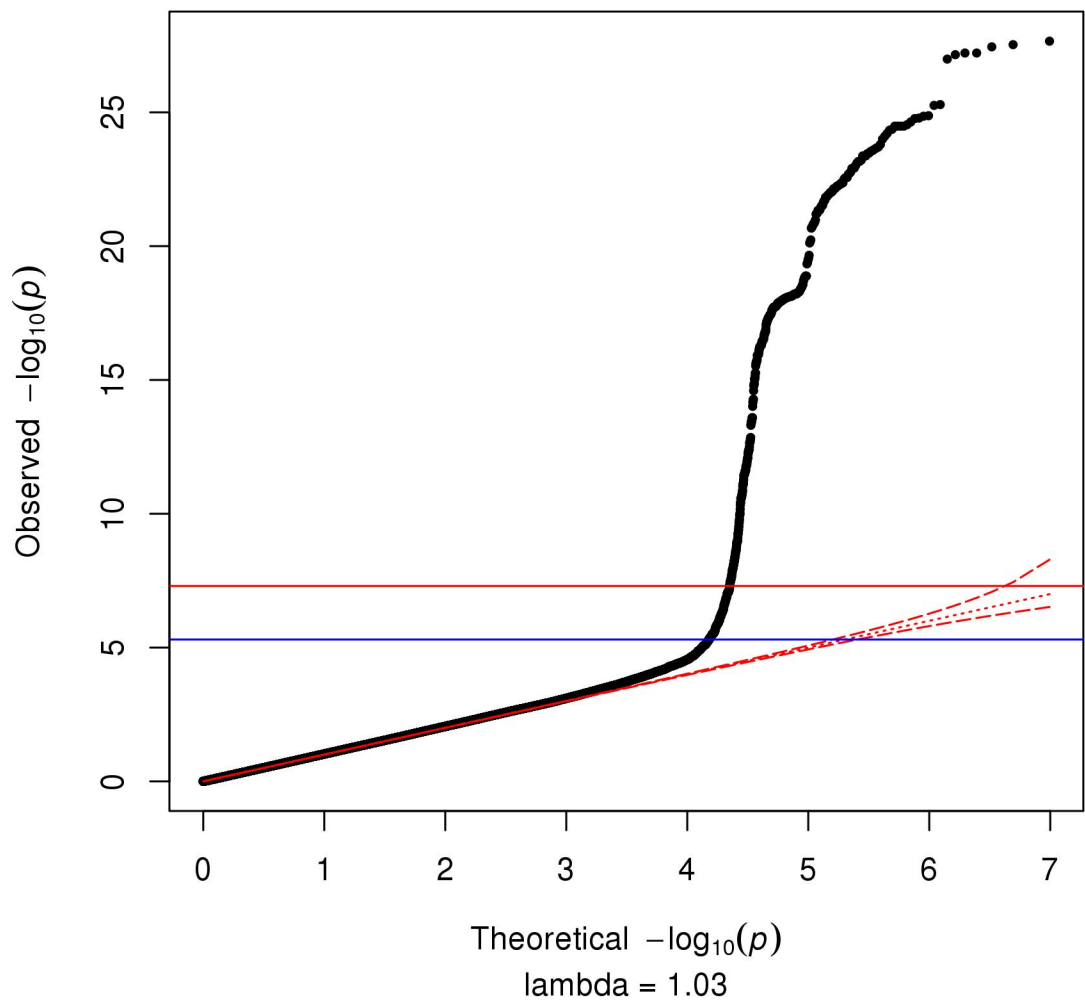

522  
523  
524

525 **Supplementary Figure 6:** Manhattan Plot for the GWAS Meta-analysis of ACE2.  
526

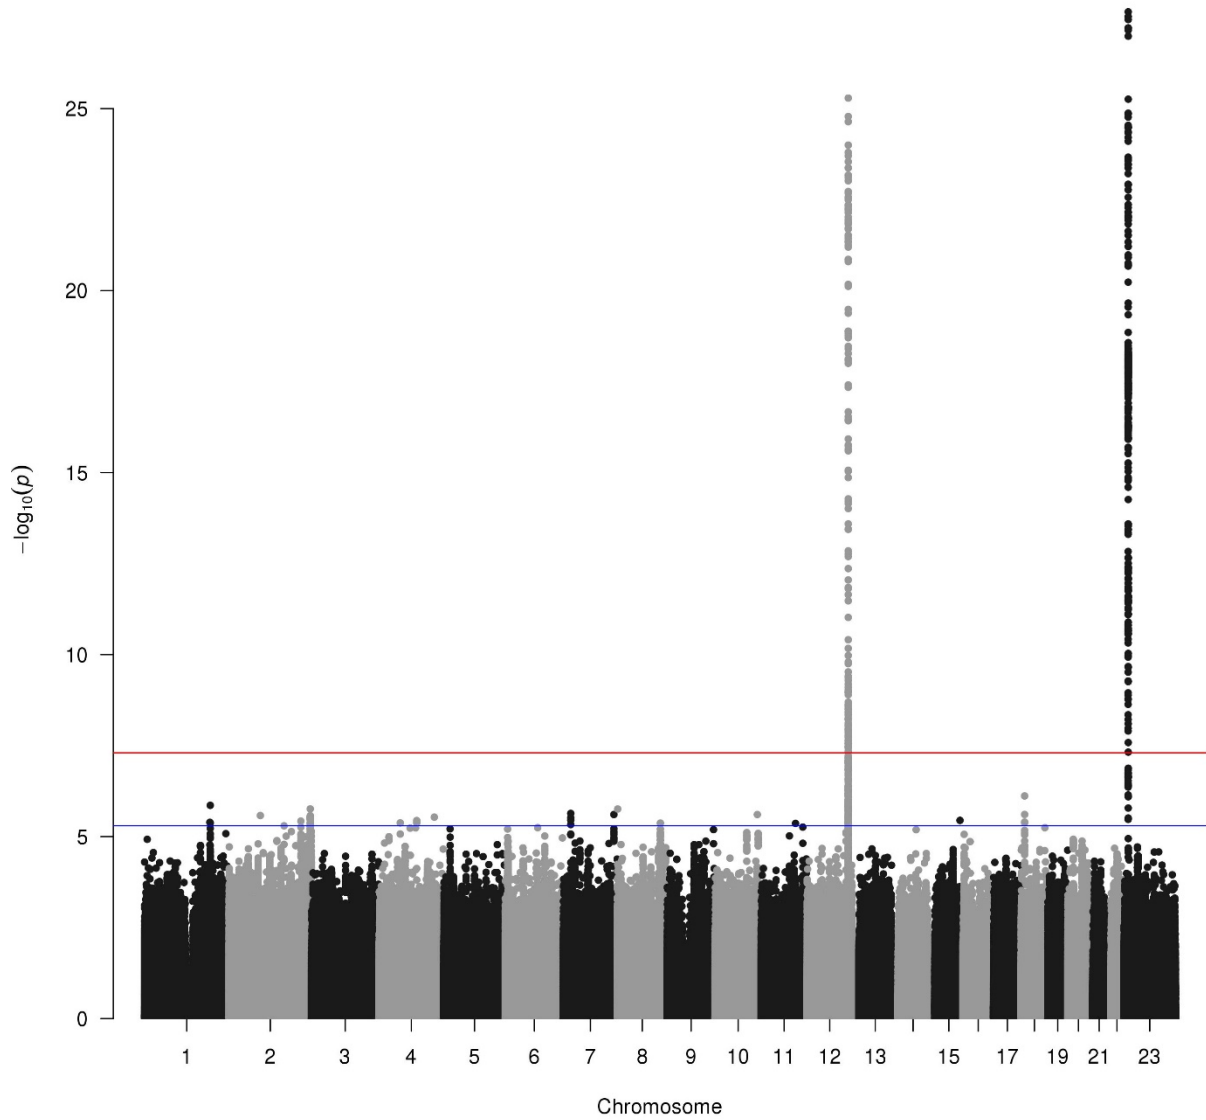

527  
528 **Supplementary Figure 6:** Two genome-wide significant ( $P < 5 \times 10^{-8}$ ) loci were detected nearby HNF1A on  
529 chromosome 12 (rs2464190;  $P = 5 \cdot 1 \times 10^{-26}$ ) and ACE2 on chromosome X (rs5936022;  $P = 2 \cdot 2 \times 10^{-28}$ ).  
530

531  
532  
533

**Supplementary Figure 7:** Map of Countries Included In PURE Biomarker Study and Average ACE2 Levels of Participants in Each Country

**Average ACE2 Concentration by Country in PURE Biomarker Study**

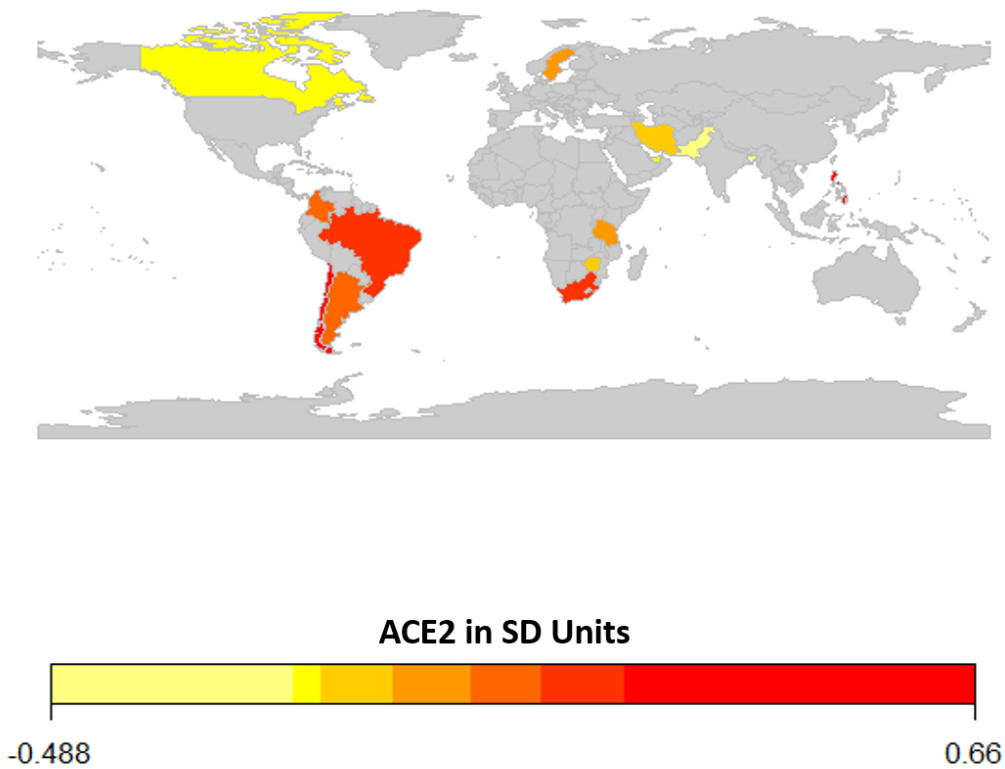

534  
535

536  
537

Supplementary Figure 8: Bootstrap Validation of Variable Ranks

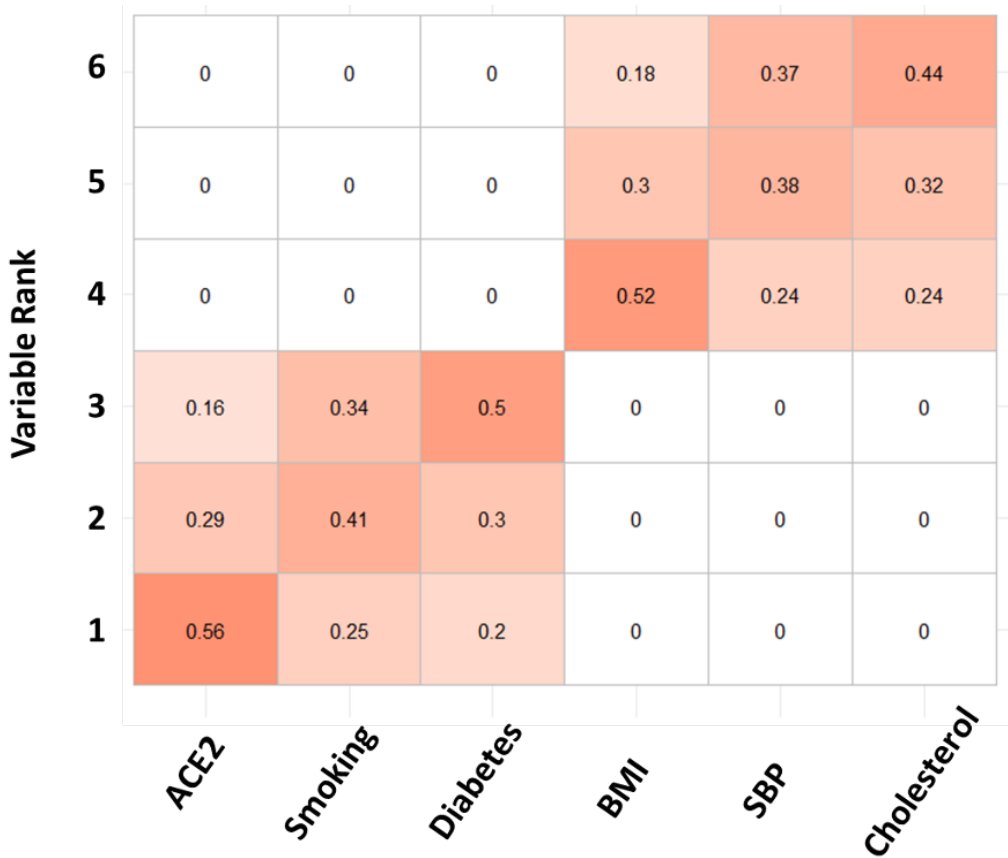

538  
539  
540  
541  
542  
543  
544  
545  
546  
547  
548  
549  
550

Supplementary Figure 8: We perform a variable ranking procedure (on the basis of a likelihood ratio chi-square) in 1000 bootstrap generated datasets. The number in each box corresponds to the proportion of times (out of 1000) that particular variable ended up in that rank. As it relates to ACE2, ACE2 was the strongest relative predictor in 555 of the bootstrapped datasets (0.555 was rounded up to 0.56), second strongest in 288, and third strongest in 157 datasets. However, this provides sufficient reason for us to see the importance of those top 3 variables (ACE2, smoking, and diabetes) relative to the bottom 3 (BMI, SBP, and Cholesterol) as none of the bottom 3 variables emerge as a top variable in any of the 1000 datasets. This shows a clear hierarchy of importance as it relates to overall mortality in our group of patients and that ACE2 has a strong relationship with mortality relative to commonly measured risk factors. These ranking distributions were consistent when using the Wald chi square statistics as the basis of ranking (for both analyses using Self-Prentice and Lin Ying derived Wald statistics).



551

552

Works Cited

- 553 1 Teo K, Chow CK, Vaz M, Rangarajan S, Yusuf S. The Prospective Urban Rural Epidemiology (PURE)  
554 study: Examining the impact of societal influences on chronic noncommunicable diseases in low-,  
555 middle-, and high-income countries. *American Heart Journal* 2009; **158**: 1-7.e1.
- 556 2 Yusuf S, Hawken S, Ôunpuu S, *et al.* Effect of potentially modifiable risk factors associated with  
557 myocardial infarction in 52 countries (the INTERHEART study): case-control study. *The Lancet* 2004;  
558 **364**: 937–52.
- 559 3 O'Donnell MJ, Xavier D, Liu L, *et al.* Risk factors for ischaemic and intracerebral haemorrhagic stroke  
560 in 22 countries (the INTERSTROKE study): a case-control study. *The Lancet* 2010; **376**: 112–23.
- 561 4 Tobin MD, Sheehan NA, Scurrah KJ, Burton PR. Adjusting for treatment effects in studies of  
562 quantitative traits: antihypertensive therapy and systolic blood pressure. *Statistics in Medicine* 2005;  
563 **24**: 2911–35.
- 564 5 the Million Veteran Program, Evangelou E, Warren HR, *et al.* Genetic analysis of over 1 million people  
565 identifies 535 new loci associated with blood pressure traits. *Nature Genetics* 2018; **50**: 1412–25.
- 566 6 Charge Diabetes Working Group, The EPIC-InterAct Consortium, EPIC-CVD Consortium, *et al.*  
567 Exome-wide association study of plasma lipids in >300,000 individuals. *Nature Genetics* 2017; **49**:  
568 1758–66.
- 569 7 Hartigan JA, Hartigan PM. The Dip Test of Unimodality. *The Annals of Statistics* 1985; **13**: 70–84.
- 570 8 Mohammadi-Shemirani P, Sjaarda J, Gerstein HC, *et al.* A Mendelian Randomization-Based Approach  
571 to Identify Early and Sensitive Diagnostic Biomarkers of Disease. *Clin Chem* 2019; **65**: 427–36.
- 572 9 Yengo L, Sidorenko J, Kemper KE, *et al.* Meta-analysis of genome-wide association studies for height  
573 and body mass index in ~700000 individuals of European ancestry. *Hum Mol Genet* 2018; **27**: 3641–9.
- 574 10 Sudlow C, Gallacher J, Allen N, *et al.* UK Biobank: An Open Access Resource for Identifying the  
575 Causes of a Wide Range of Complex Diseases of Middle and Old Age. *PLoS Med* 2015; **12**.  
576 DOI:10.1371/journal.pmed.1001779.
- 577 11 Mahajan A, Wessel J, Willems SM, *et al.* Refining the accuracy of validated target identification  
578 through coding variant fine-mapping in type 2 diabetes. *Nat Genet* 2018; **50**: 559–71.
- 579 12 Liu M, Jiang Y, Wedow R, *et al.* Association studies of up to 1.2 million individuals yield new insights  
580 into the genetic etiology of tobacco and alcohol use. *Nat Genet* 2019; **51**: 237–44.
- 581 13 Pigeyre M, Sjaarda J, Chong M, *et al.* ACE and Type 2 Diabetes Risk: A Mendelian Randomization  
582 Study. *Diabetes Care* 2020; **43**: 835–42.
- 583 14 Gill D, Georgakis MK, Koskeridis F, *et al.* Use of Genetic Variants Related to Antihypertensive Drugs  
584 to Inform on Efficacy and Side Effects. *Circulation* 2019; **140**: 270–9.

585
